# Supplementary material for: Modelling the relative influence of socio-demographic variables on post-acute COVID-19 quality of life
Source: bioRxiv or medRxiv preprint supplement (doi:10.1101/2024.02.21.24303099), 2026-04-17
Supplement: Supplementary file [file media-1.pdf]

## Supplementary Appendix

### Supplementary methods

#### A. Long COVID QALDs calculation

Long COVID QALDs were computed as the complement of the sum of the relevant utility weights for each participant, transformed by 365 days, which assumes symptoms persist for a year:

$$\text{Long COVID QALDs}_i = (1 - \sum_{k=1}^5 \text{QALY.weight.post}_{ki}) * \text{duration}$$

Where  $i$  denotes subject,  $k$  denotes each of the five items of the EQ-5D-5L survey,  $\text{QALY.weight.post}_{ki}$  is the weight from the appropriate value set corresponding to the chosen response for item  $k$  for subject  $i$ , and  $\text{duration}$  is the assumed duration of long-term COVID symptoms (1 year for all)

#### B. Variable preparation, missing data imputation, and post-stratification weighting

In the UK and the combined middle-income country (MIC) cohort, COVID-19 disease severity was defined following the categorization in Reyes et al.<sup>1</sup> That is, subjects who reported any of the following outcomes (high-flow nasal cannula, ventilation, or the use of inotropes or vasopressors) during their hospital admission were classified as having severe acute COVID-19 disease.<sup>1</sup> Severity indicators were classified as unknown among subjects who had missing entries for all five possible indicators. In Norway, there was little information available on any of the aforementioned outcomes and another measure of acute COVID-19 severity, hospitalization for acute COVID-19 infection (any or ICU admission), was very sparsely recorded. Therefore, we excluded this variable among our factors under consideration in this cohort.

Vaccination data was obtained using a search for the following key terms within the field for immunization against COVID-19: Moderna, Pfizer, AstraZeneca, and Janssen, as well as “COVID vaccination”, “COVID-19 vaccination”, and “COVID-19 vaccine type”, which were the general categories recorded when no specific brand was noted.

Antiviral and additional treatment data was obtained using a search for the following key terms within the field for treatment: darunavir, remdesivir, acyclovir, valganciclovir, lopinavir/ritonavir, metformin, as well as “Antiviral agent”, which was a general category recorded when no specific type was noted. We selected these drugs as those explicitly listed as possible options in the ISARIC follow-up surveys, as well as a diabetes drug that has been identified to be protective against long COVID (metformin).<sup>2</sup> Data on the two most currently supported therapies nirmatrelvir and molnupiravir was not available in any cohort.

Missingness was reported for the following variables: Norway: educational attainment (17.6%), race/ethnicity (2.3%), sex (1.2%), age (0.006%), vaccination status (0.90%), antiviral treatment during illness (83.5%); UK: employment status (11.2%), race/ethnicity (1.6%), vaccination status (66.5%), and antiviral treatment during illness (22.3%); and Combined Middle-income country (MIC) cohort: employment status (3.3%), race/ethnicity (72.0%), age (0.006%), vaccination status (76.5%), antiviral treatment during illness (77.0%) and acute COVID-19 severity (3.7%).

Missing variable imputation was performed via Multiple Imputation by Chained Equations (MICE) using the *mice* package.<sup>3</sup> For all cohorts, we specified 10 imputations and 10 iterations following standard practice, where, for each iteration, missing variables were expressed as a function of all other variables via polytomous regression (for categorical variables), logistic regression (for binary variables), and predictive mean matching (for continuous variables). Missing values were then assigned the majority imputation across runs for the corresponding variable.

Post-stratification weights in the Norway and the UK cohorts were assigned to each subject using the *raking* procedure (applying the R package *anesrake*<sup>4</sup>), which adjusts the distribution of each of the sampled populations on the basis of sex to correspond to its distribution in the overall population.<sup>5-7</sup>

### C. Quantifying variable importance

For all analyses, comorbidities were filtered to only include conditions with at least ten subjects reporting having them. All of our random forest regressions were trained on 80% of the dataset using the *caret* package.<sup>8</sup> For the individual RF and pre-grouped RF, variables were ranked according to their associated % increase in mean squared error, averaged over 100 runs. To run these RFs, we used the *randomForest* package<sup>9</sup>. While we averaged our results across 100 runs for the individual and pre-grouped analyses, we considered a fewer number of runs (50) for the model-grouped analysis to avoid exorbitant model costs, due to the resource intensiveness of each CoV-VSURF run, using the *CoVVSURF* package.<sup>10</sup> For Norway, we used dummy variables representing belong to each quintile of educational attainment compared to the referent category of quintile 1 for RF #3, as CoV-VSURF does not accept ordered factors as inputs. Finally, for the population adjustment sensitivity analysis, weights were incorporated in all random forest implementations using the `sample_weight` parameter in the `randomForest`<sup>9</sup> and `covsurf`<sup>10</sup> functions.

For our pre-grouped random forest regression implementation, we applied multiple factor analysis to each cluster, which corresponds to a principal component analysis for numeric variables and multiple correspondence analysis for categorical variables, considering the first and second principal components of each. For binary variables, we replaced subjects' values with the loading obtained for that variable, with variable coordinates defined by the square root of the component's eigenvalue<sup>11</sup>, if present, and with 0, if absent. For categorical variables with more than one level, we replaced subjects' values with the loading obtained for the relevant

level of that variable. For numeric variables, we multiplied subjects' values by the loading obtained for that variable. For each cluster, we then summed the resulting weighted variables by subject and by component, reducing the number of variables for each cluster  $i$  from  $p_{cluster.i}$  to two. The resulting reduced number of covariates were then used as features for our random forest model runs. We used the *FactoMineR* package<sup>12</sup> to conduct this cluster summary analysis.

#### D. Estimating NDEs, NIEs, and proportions non-mediated

Estimating the NDE, NIE, and proportion mediated through targeted maximum likelihood estimation requires two key steps.<sup>13,14</sup> First, the data is divided into  $k$  cross-validation folds ( $k=10$  in the case of the combined cohort), to which we train and test our algorithms of choice, where the response measure is the expected mean of long COVID QALDs dependent on each of our binary SES proxies or female sex, the confounders, and mediators.<sup>13,14</sup> The algorithms we consider are simple intercept models and generalized additive models (GAMs)<sup>15</sup>, the latter equipped to accommodate non-linear forms for continuous covariates, in addition to gradient boosted regression trees<sup>16</sup>, using the *lightgbm* package<sup>17</sup> and feed-forward neural networks<sup>18</sup> using the *nnet* package<sup>19</sup>, both of which can better capture underlying nonlinear trends nonparametrically. The super learner ensemble modeling procedure<sup>20</sup> (via the *sl3* package<sup>21</sup>) then pinpoints the combination of weights to assign to each algorithm that minimizes the (cross-validated) mean risk across all folds in a theoretically optimal manner, through the non-negative least squares metalearner, via the *nnls* package.<sup>22</sup> The expected means of long COVID QALDs dependent on each of our binary SES proxies or female sex, the confounders, and mediators under the two levels of the exposure are then estimated using the weighted sum of each algorithm's fit to the original data.<sup>13,14</sup> The difference in these fitted means of long COVID QALDs dependent on each of our binary SES proxies or female sex, the confounders, and mediators for each level of the exposure, alongside the conditional probability of each of our binary SES proxies or female sex, dependent on confounders and the conditional probability of each of our binary SES proxies or female sex, dependent on confounders and mediators are subsequently used to estimate the NDE and NIE.<sup>13,14</sup> For the country-specific analyses, due to sample size constraints, our cross-validated ensemble learner specification consisted of the intercept and GAM models for South Africa and Brazil and the intercept and GAM models plus boosted regression trees for India.

In all analyses, 95% confidence intervals (CIs) were provided for our measures of interest estimated in *medoutcon*<sup>23</sup>, i.e., the NDE, NIE, and proportion mediated. Proportions non-mediated are calculated as the complement of estimated proportions mediated. For CIs of the proportion mediated with upper bounds falling below 0 (i.e. upper bound of the CI of the proportion non-mediated exceeding 1), we reported CIs bounded by 1. For the population adjustment sensitivity analysis, weights were incorporated using the *survey\_weight* parameter in *medoutcon*.<sup>23</sup> Finally, for the combined MIC cohort, we did not implement a full-time employment versus unemployment comparison given the notable gap in sample sizes between the two groups (830 vs 115, respectively).

Directed acyclic graphs (DAGs) were drawn using the *dagitty*<sup>24</sup> and *ggdag*<sup>25</sup> packages.

#### E. Additional analyses

All correlation plots were produced by computing Phi coefficients for binary variable comparisons and Point-Biserial Correlation coefficients for binary versus continuous variable comparisons.

To compute the crude association between long COVID QALDs and sex, we conducted Wilcoxon rank sum test to avoid imposing any assumptions about normality of long COVID QALDs.

All analyses were run using the R statistical software (version 4.2.2).<sup>26</sup>

### **Supplementary results**

#### *Comparison of EQ-5D-5L responses by demographic groups*

##### A. Combined MIC cohort

For anxiety/depression, subjects who reported being part-time employees skewed towards higher values, compared to all other employment categories (Supplementary Figure S3A)). For mobility, subjects who reported being retired skewed towards higher values, followed again by all other categories (Supplementary Figure S3A). Pain/discomfort tended towards relatively higher values for both these categories (Supplementary Figure S3A). Finally, the distribution of responses for self-care and usual activities revealed similarly low values for all employment categories (Supplementary Figure S3A).

The distribution of EQ-5D-5L responses was nearly equivalent for both sexes on every dimension except pain/discomfort, where females skewed towards greater challenges (Supplementary Figure S4A).

##### B. Norway

We found minimal differences across educational attainment quintiles in reported responses for the dimensions anxiety/depression, pain/discomfort, self-care and mobility (Supplementary Figure S3B). However, quintiles 4 and 5 skewed towards lower responses for usual activities, indicating fewer challenges for that dimension (Supplementary Figure S3B). Males and females reported similar distributions in responses for the EQ-5D-5L dimensions anxiety/depression, mobility, pain/discomfort, and self-care (Supplementary Figure S4B). However, males skewed towards lower values for usual activities (Supplementary Figure S4B).

### C. UK

There was considerable heterogeneity across employment status categories in responses to each of the five EQ-5D-5L dimensions (Supplementary Figure S3C).

Males and females reported similar distributions in responses for the EQ-5D-5L dimensions for pain/discomfort (Supplementary Figure S4C). However, males skewed towards lower values for anxiety/depression, self-care, and usual activities (Supplementary Figure S4C). Overall, males reported perceptibly higher long COVID QALDs than females, by around 13.4%.

#### Tables

**Supplementary Table S1. Selected studies for extracting utility weights**

| Cohort              | Study (Country)                             |
|---------------------|---------------------------------------------|
| Norway              | Sun et al., 2022 <sup>27</sup> (Norway)     |
| UK                  | Devlin et al., 2018 <sup>28</sup> (England) |
| Combined MIC cohort | Jyani et al., 2022 <sup>29</sup> (India)    |

**Supplementary Table S2. Final employment status groupings**

| Group category       | Norway                                                                                                                                                                                                        | Combined MIC cohort                                                                            |
|----------------------|---------------------------------------------------------------------------------------------------------------------------------------------------------------------------------------------------------------|------------------------------------------------------------------------------------------------|
| Retired              | “Medically retired”, “Retired”, “Retired_Medically retired”, “Unable to work due to chronic illness_Retired”                                                                                                  | “Medically retired”, “Early Retirement Due to Illness”, “Retired”                              |
| Unemployed           | “Unemployed”, “Unable to work due to chronic illness”                                                                                                                                                         | “Unemployed”, “Unable to Work Due to Chronic Illness”, “Unable to Work due to Chronic Illness” |
| Full-time employment | “Full-time employment”, “Full time carer (children or other)”, “Full-time employment_Prefer not to say”, “Full-time employment_Full time carer (children or other)”, “Working full-time”, “Working Full-time” | “Working Full-Time”                                                                            |
| Carer                | NA (small n, so grouped w/ full-time employment above)                                                                                                                                                        | “Full time carer (Children or Other)”, “Full Time Carer”                                       |

|                      |                                                                  |                        |
|----------------------|------------------------------------------------------------------|------------------------|
|                      |                                                                  | (Children or Others)", |
| Furloughed           | "Furloughed", "Full-time employment_Furloughed"                  | NA                     |
| Student              | "Student"                                                        | Student                |
| Part-time employment | "Part-time employment", "Working Part-time", "Working part-time" | "Working Part-Time"    |

**Supplementary Table S3. Predetermined groupings of variables, by country, for RF #2**

| <b>Group</b> | <b>Norway</b>                                                            | <b>UK</b>                                                                                                                                                    | <b>Combined MIC cohort</b>                                               |
|--------------|--------------------------------------------------------------------------|--------------------------------------------------------------------------------------------------------------------------------------------------------------|--------------------------------------------------------------------------|
| 1            | Age                                                                      | Age                                                                                                                                                          | Age                                                                      |
| 2            | Educational attainment (years), educational attainment quintile, sex     | Employment status, sex                                                                                                                                       | Employment status, sex                                                   |
| 3            | Asthma, chronic pulmonary disease (not asthma), smoking                  | Asthma, chronic pulmonary disease (not asthma), bronchiectasis, smoking                                                                                      | Asthma, chronic pulmonary disease (not asthma), smoking                  |
| 4            | Obesity, type 1 diabetes, type 2 diabetes, diabetes (type not specified) | Obesity, type 1 diabetes, type 2 diabetes, diabetes (type not specified)                                                                                     | Obesity, type 1 diabetes, type 2 diabetes, diabetes (type not specified) |
| 5            | Chronic cardiac disease (not hypertension), hypertension                 | Congestive heart failure, ischemic heart disease, atrial fibrillation, chronic cardiac disease (not hypertension), hypertension, peripheral vascular disease | Chronic cardiac disease (not hypertension), hypertension                 |
| 6            | Chronic kidney disease, liver disease (severity not specified)           | Gastrointestinal (GI) disease, chronic metabolic endocrine disease, GI reflux disease, hypothyroidism, lipid disorder                                        | Chronic kidney disease, mild liver disease                               |
| 7            | Chronic hematological disease, rheumatological disorder                  | Chronic hematological disease, rheumatological disorder                                                                                                      | Rheumatological disorder                                                 |

|    |                                                       |                                                       |                                                       |
|----|-------------------------------------------------------|-------------------------------------------------------|-------------------------------------------------------|
| 8  | Psychological disorder, chronic neurological disorder | Psychological disorder, chronic neurological disorder | Psychological disorder, chronic neurological disorder |
| 9  | Malignant neoplasm                                    | Malignant neoplasm                                    | Malignant neoplasm                                    |
| 10 | Other                                                 | Myocardial infarction (MI)                            | Other                                                 |
| 11 | Vaccination status                                    | Chronic infection                                     | Country                                               |
| 12 | N/A                                                   | Other                                                 | COVID-19 disease severity indicator                   |
| 13 | N/A                                                   | Antiviral treatment                                   | N/A                                                   |
| 14 | N/A                                                   | COVID-19 disease severity indicator                   | N/A                                                   |

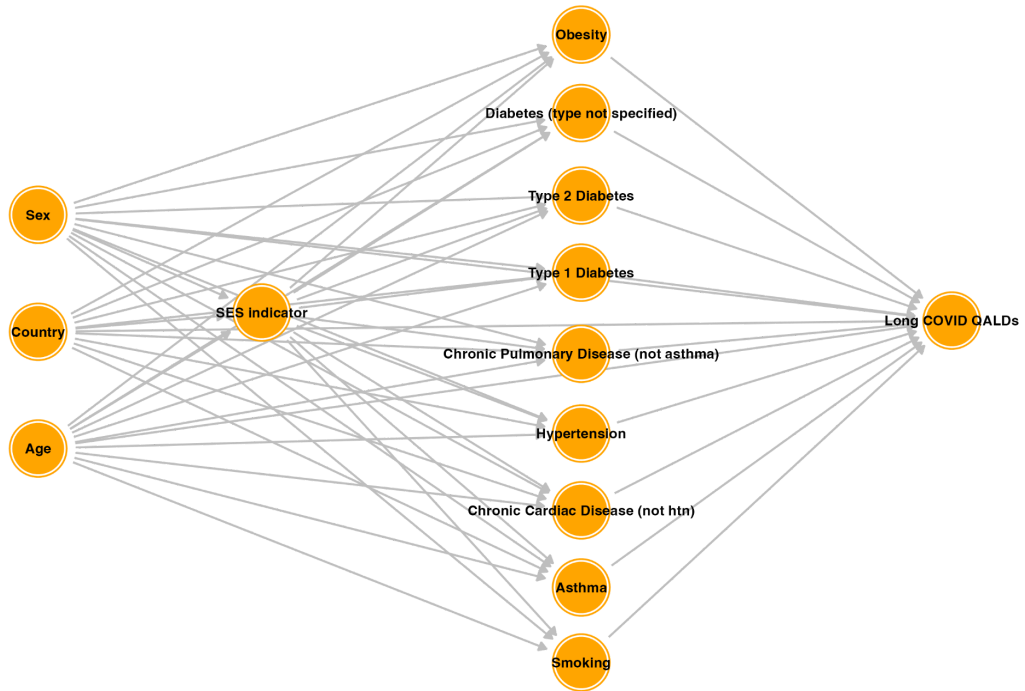

(A)

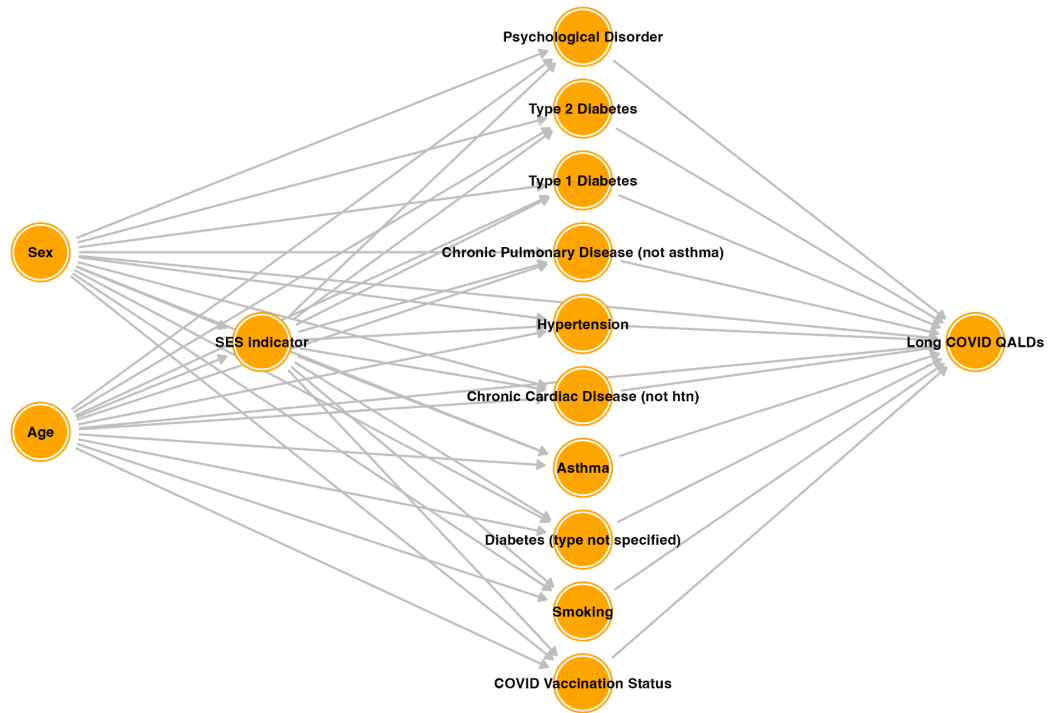

(B)



(C)

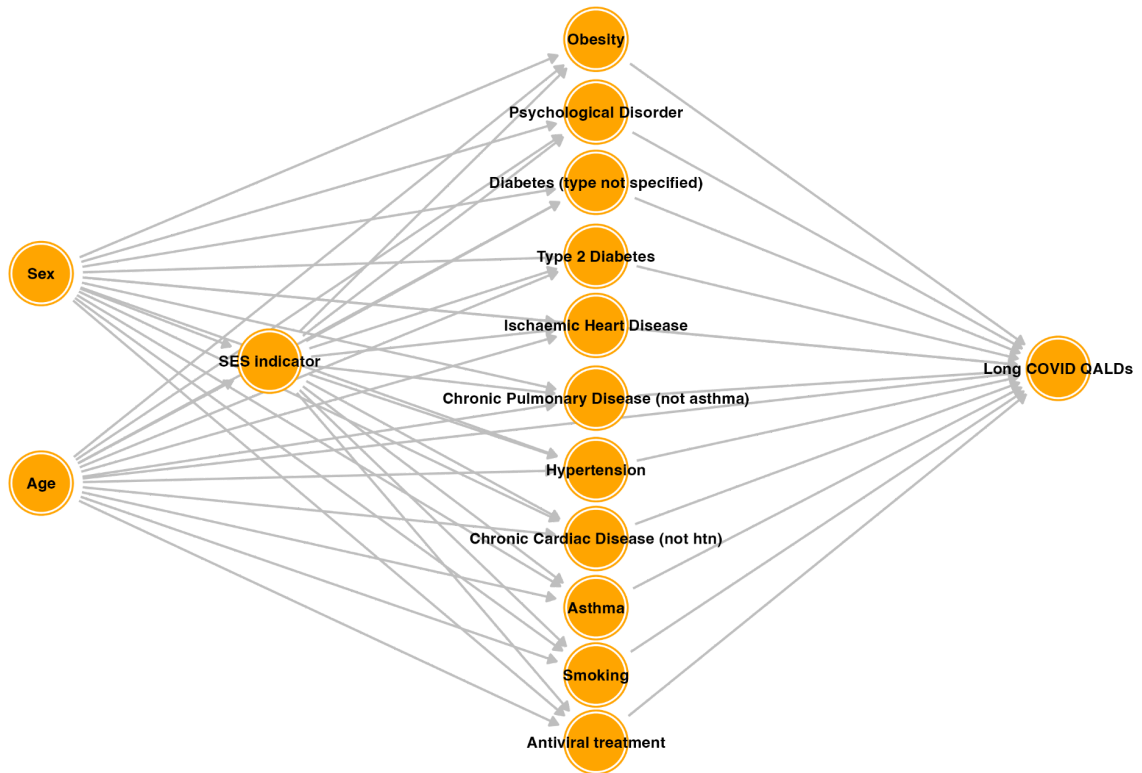

**Supplementary Figure S1. Assumed DAGs for the combined MIC cohort, Norway, and UK with SES indicators as exposure. DAG for employment status binary variable in the combined MIC cohort (A), DAG for educational attainment binary variable in Norway (B), DAG for employment status binary variable in the UK (C). Note: htn = hypertension, in “Chronic Cardiac Disease (not htn).”**

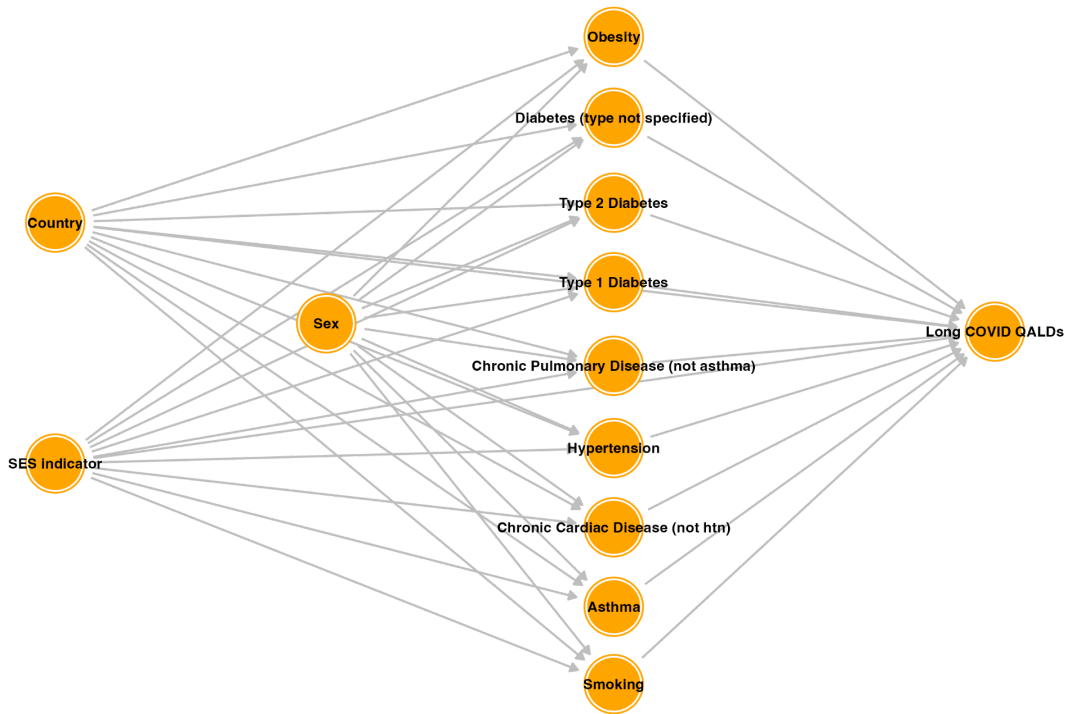

(A)

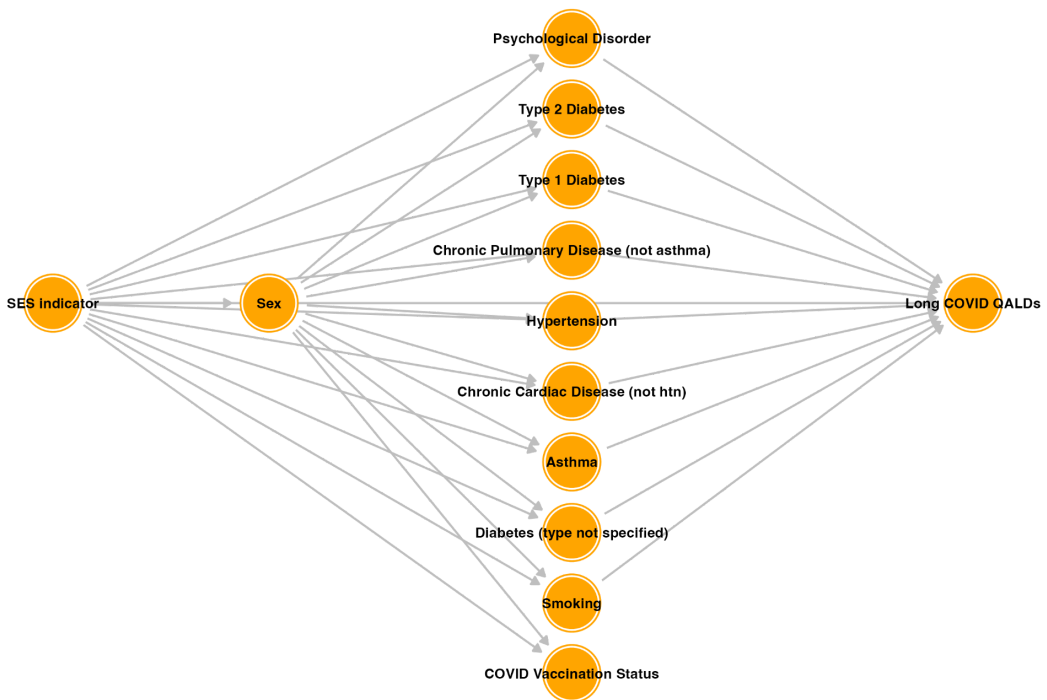

(B)

(C)

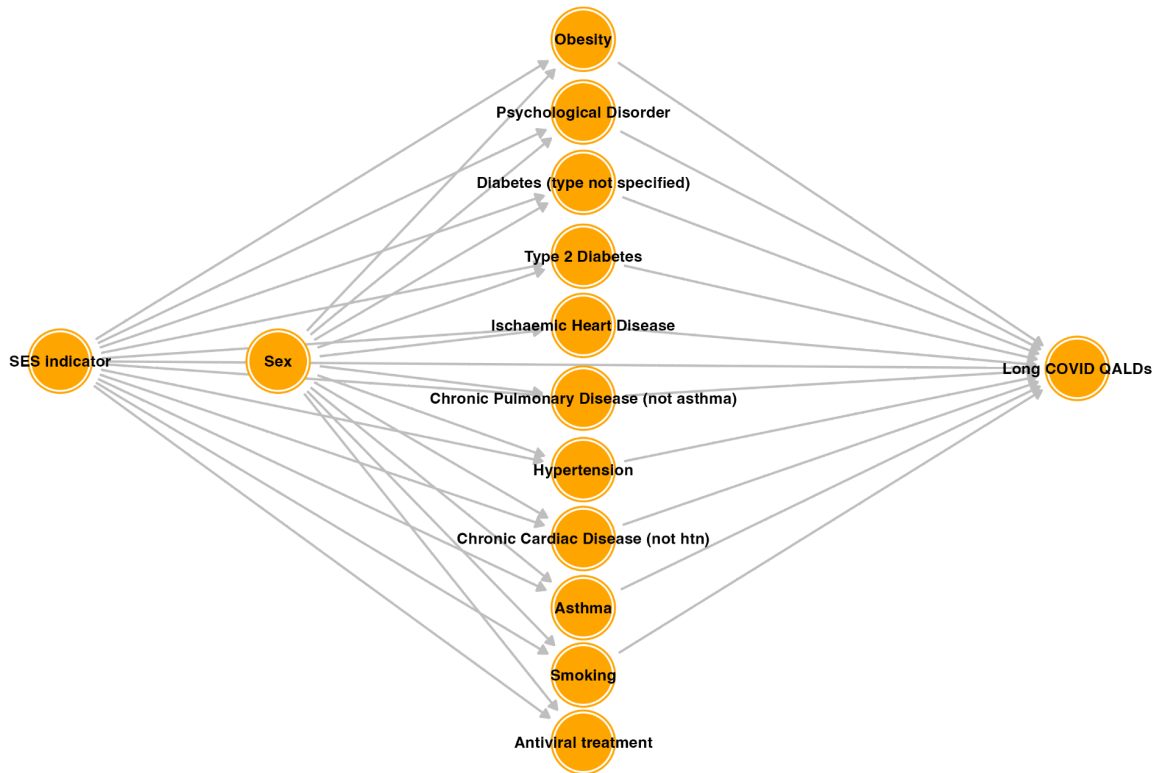

Supplementary Figure S2. Assumed DAGs for the combined MIC cohort, Norway, and the UK with Sex (female vs male) as exposure. DAG for Sex in the combined MIC cohort (A), DAG for Sex in Norway (B), DAG for Sex in the UK (C). Note: htn = hypertension, in “Chronic Cardiac Disease (not htn).”

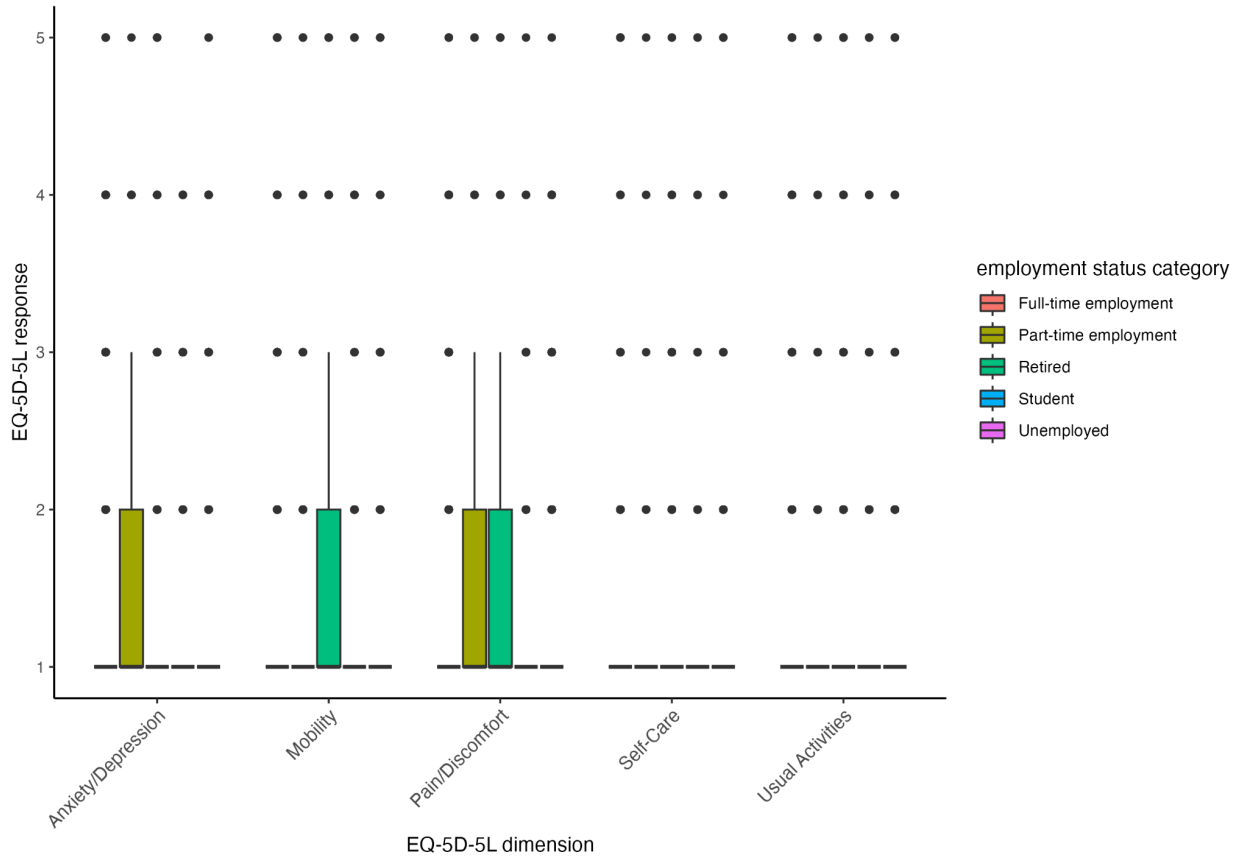

(A)

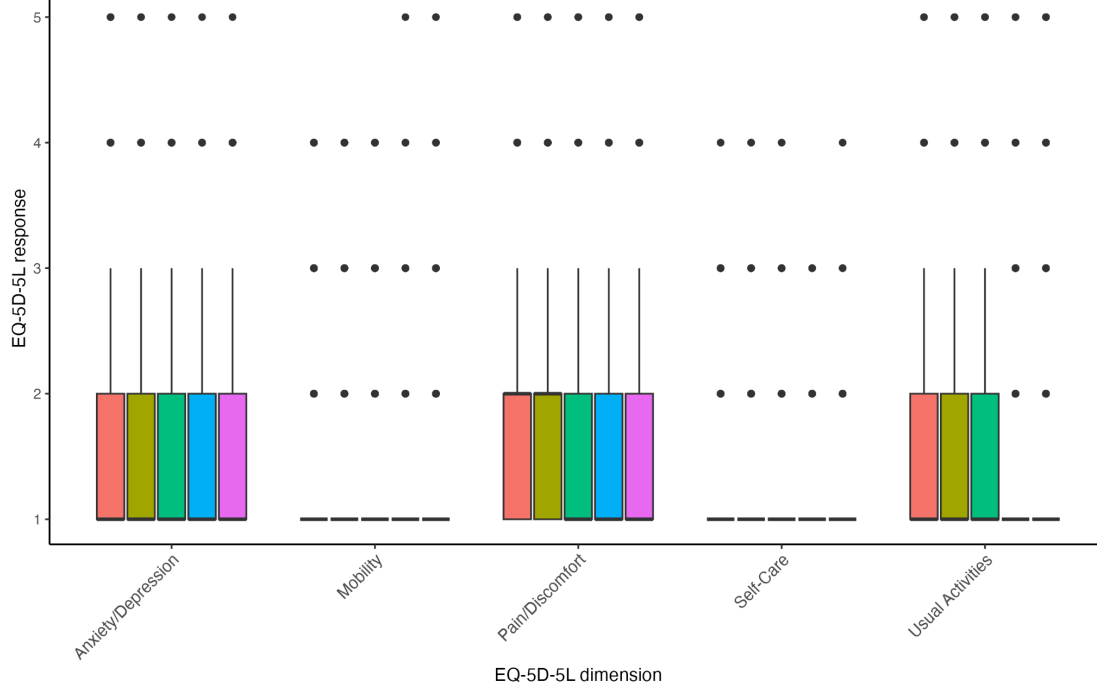

(B)

educational attainment quintile 1 2 3 4 5

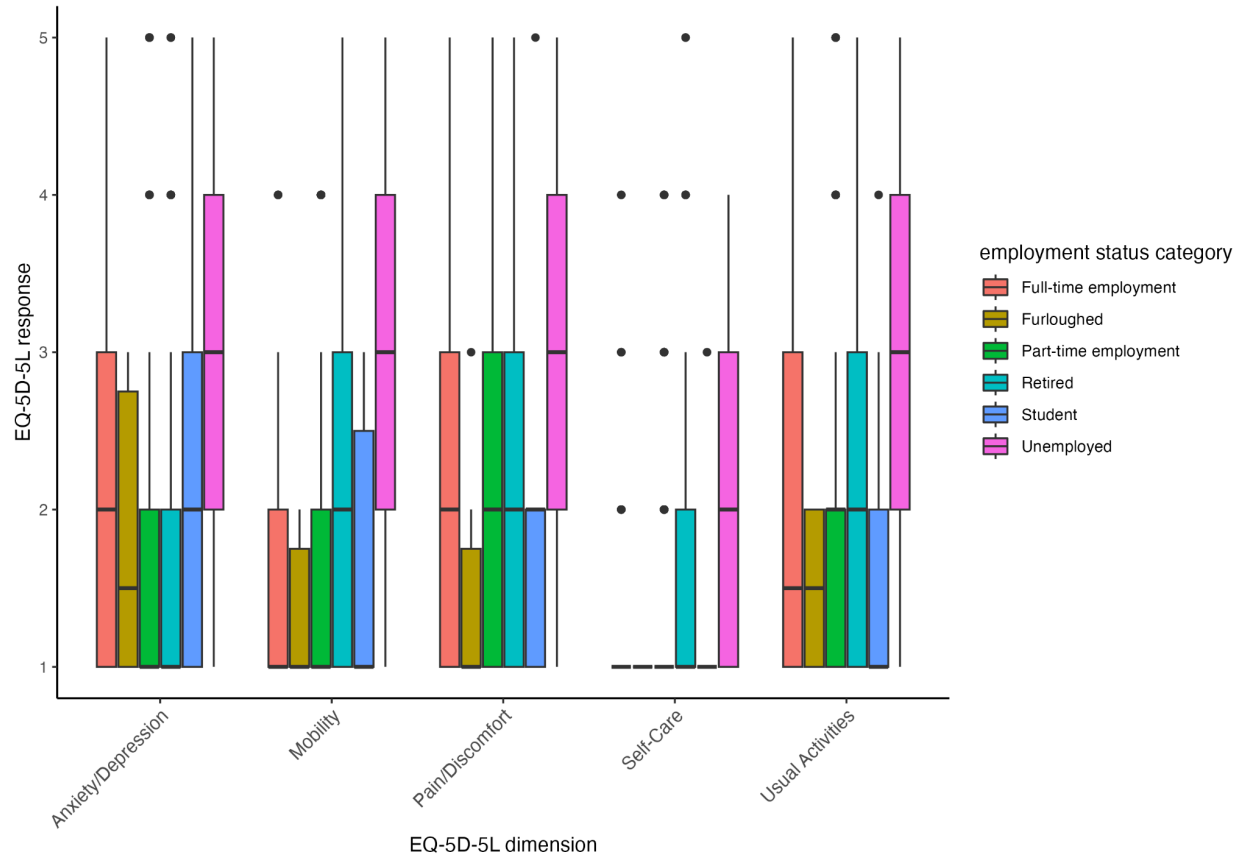

(C)

**Supplementary Figure S3. Boxplot comparisons of EQ-5D-5L responses (score of 1-5) by dimension and employment status category in the combined MIC cohort (A), by dimension and quintile of educational attainment in Norway (B) and by dimension and employment status category in the UK (C). Bars denote median scores. Points are drawn for scores which lie 1.5\*the interquartile range units above the upper quartile.**

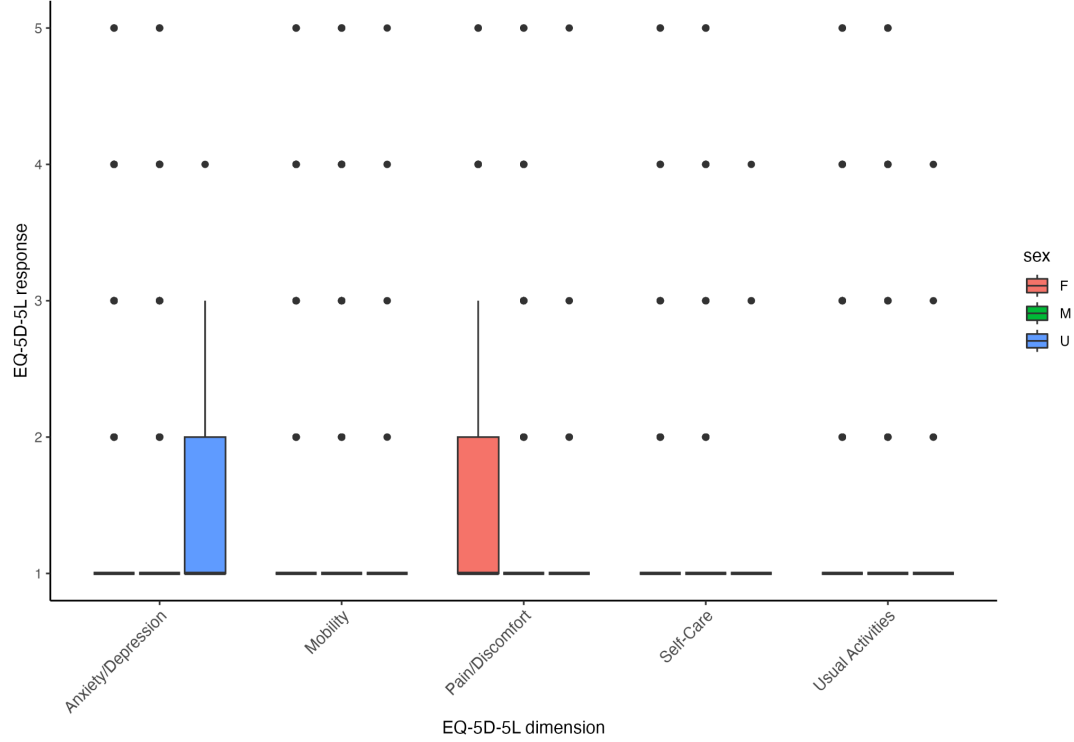

(A)

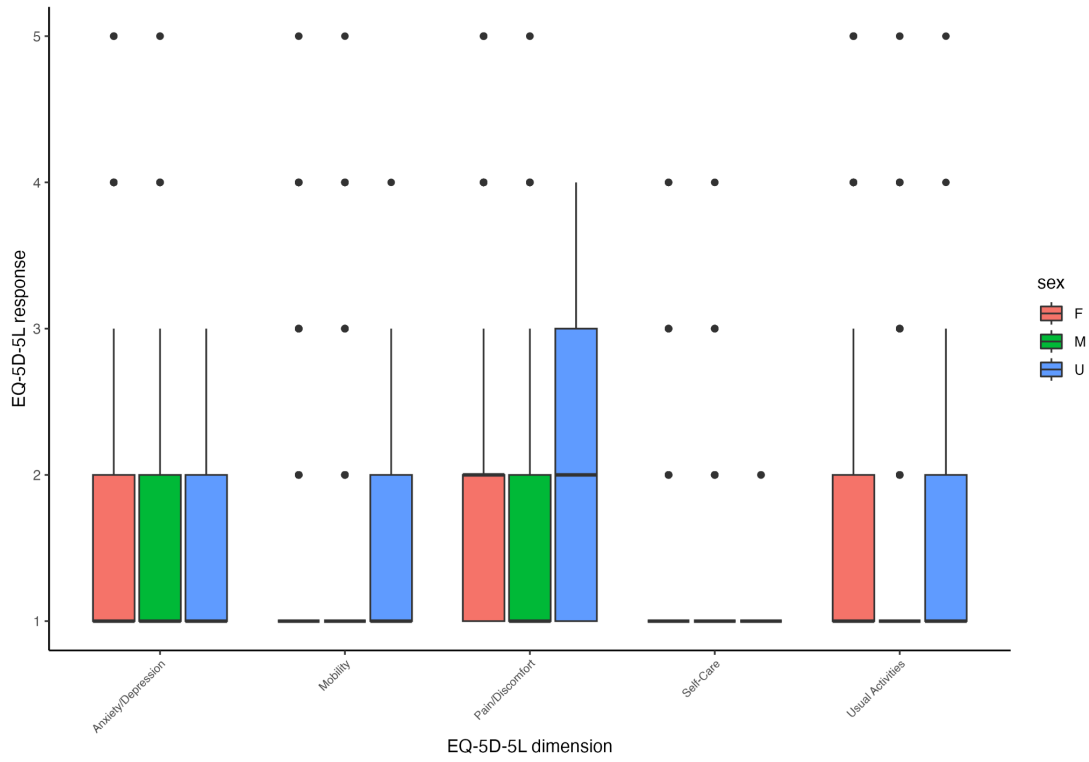

(B)

(C)

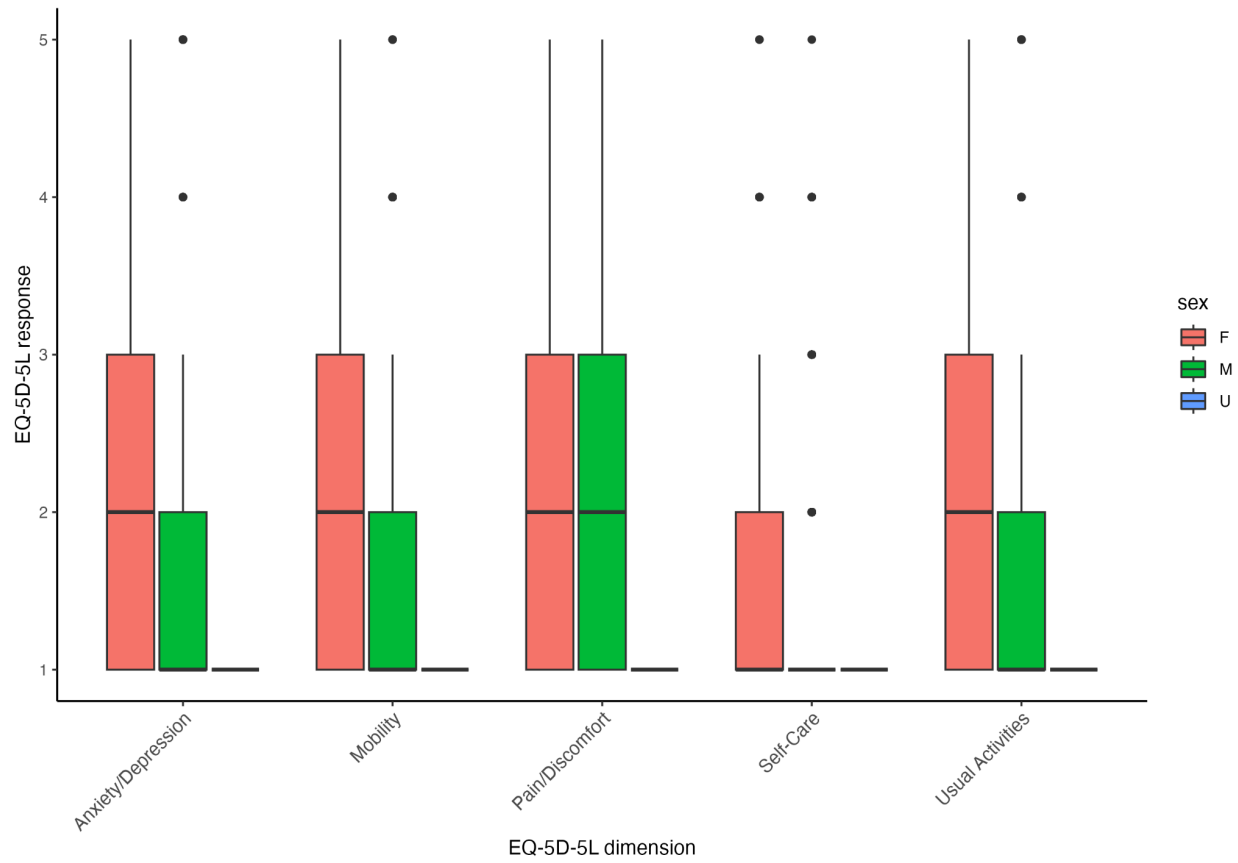

**Supplementary Figure S4. Boxplot comparisons of EQ-5D-5L responses by dimension and sex (Female (F), Male (M), and Unknown (U)) in the combined MIC cohort (A) Norway (B) and the UK (C). Points are drawn for scores which lie 1.5\*the interquartile range units above the upper quartile.**

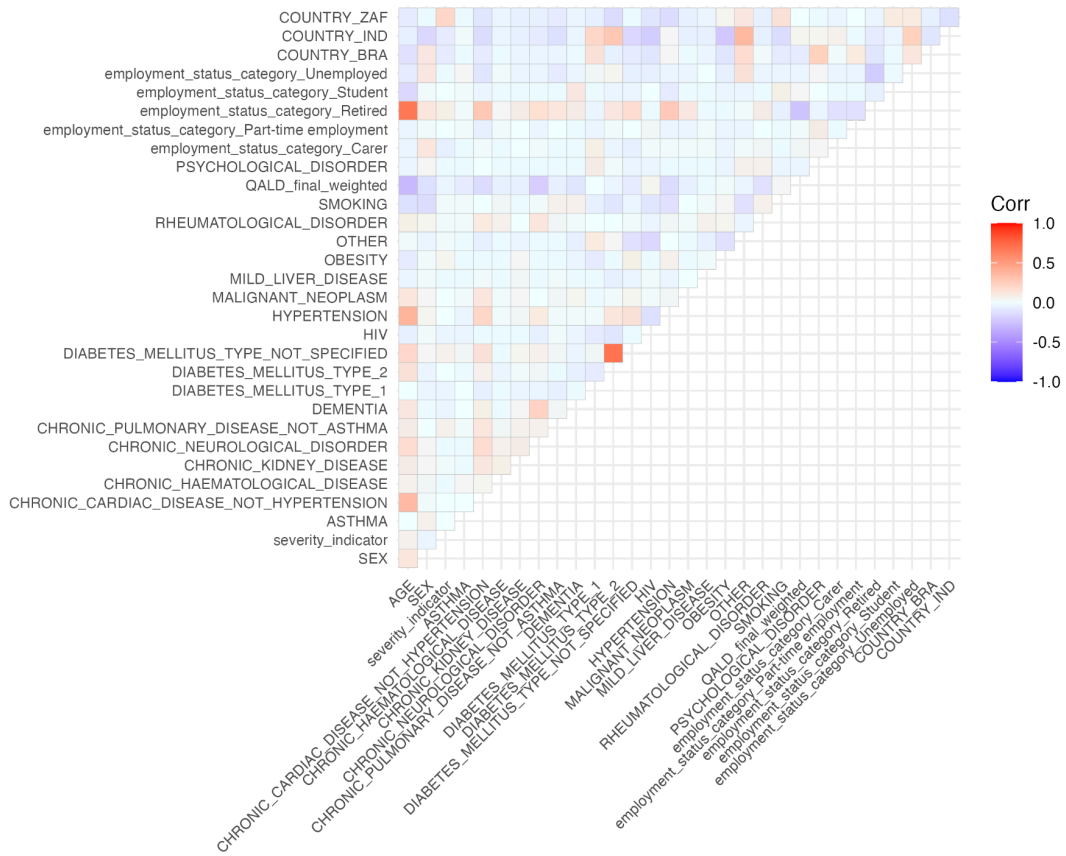

**Supplementary Figure S5. Correlation plots for all variables (combined MIC cohort).**



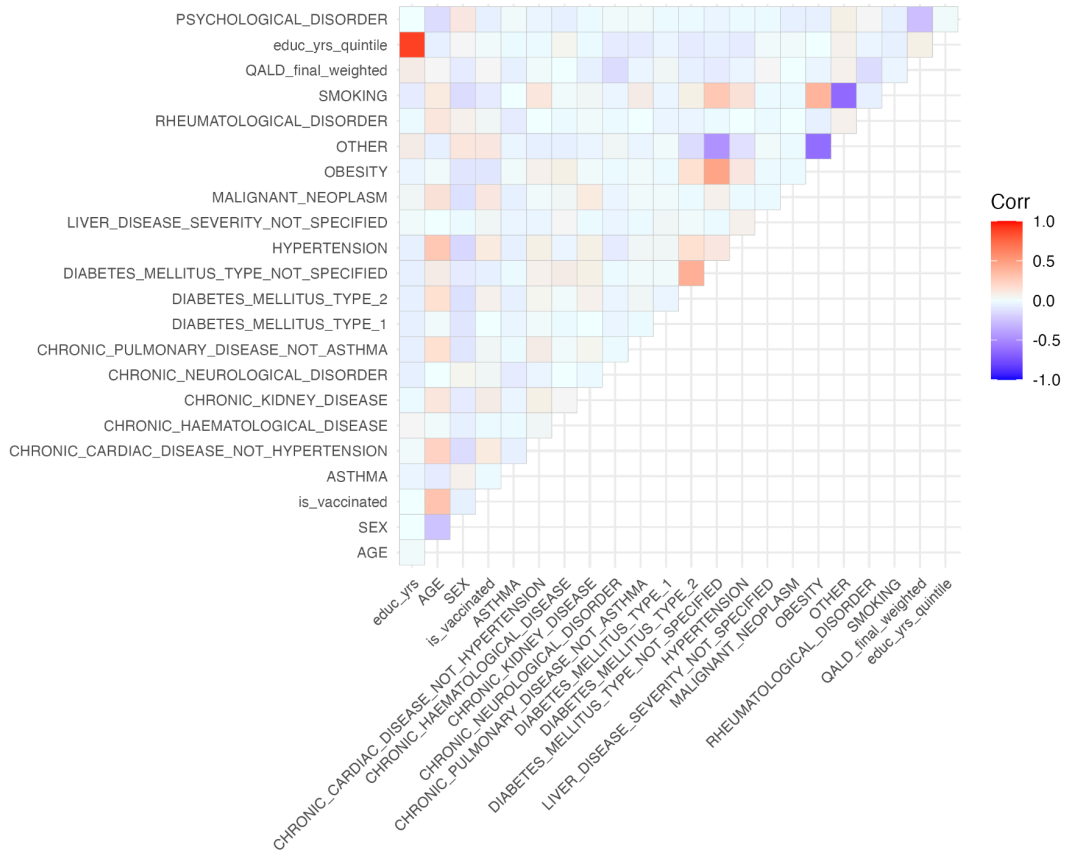

**Supplementary Figure S6. Correlation plots for all variables (Norway).**

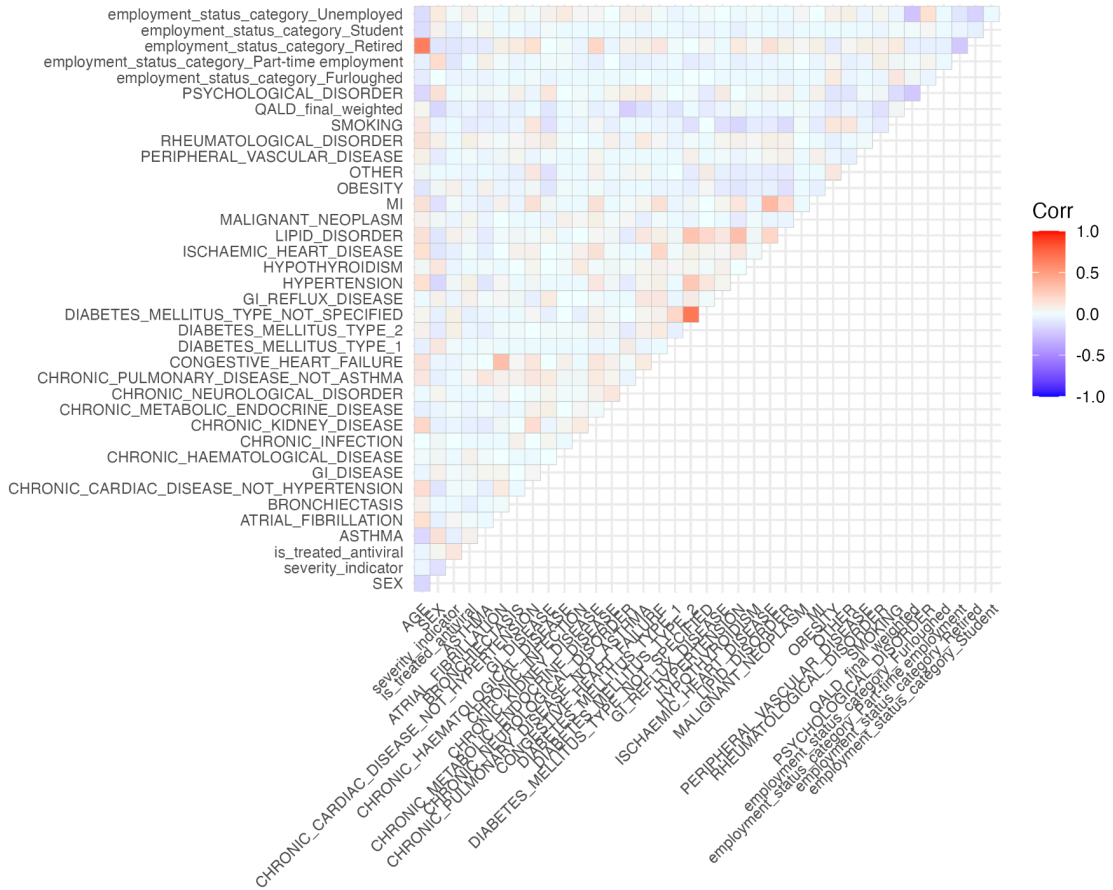

**Supplementary Figure S7. Correlation plots for all variables (UK).**

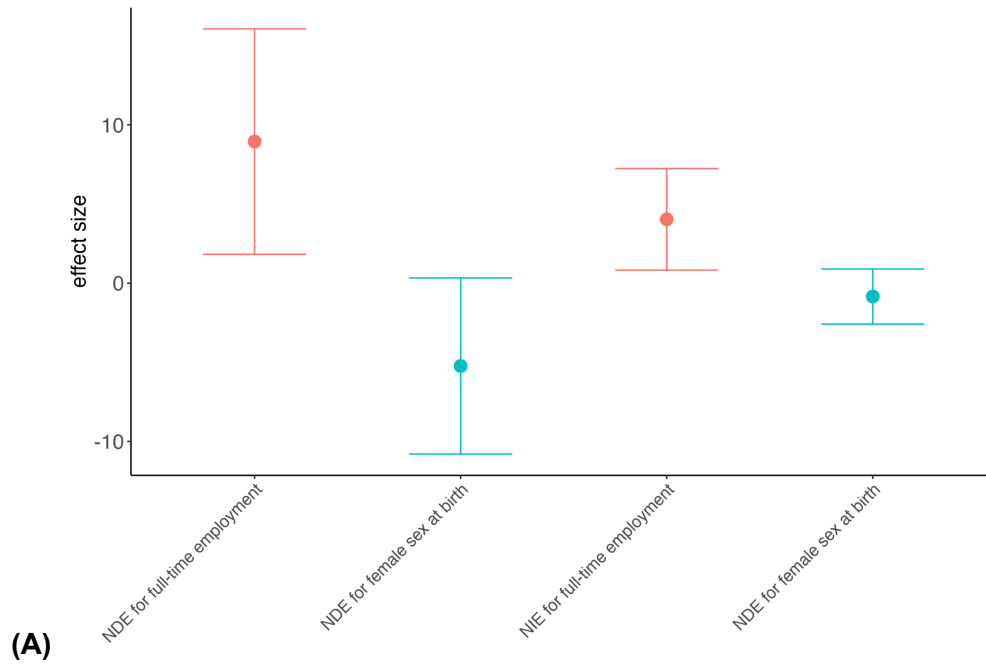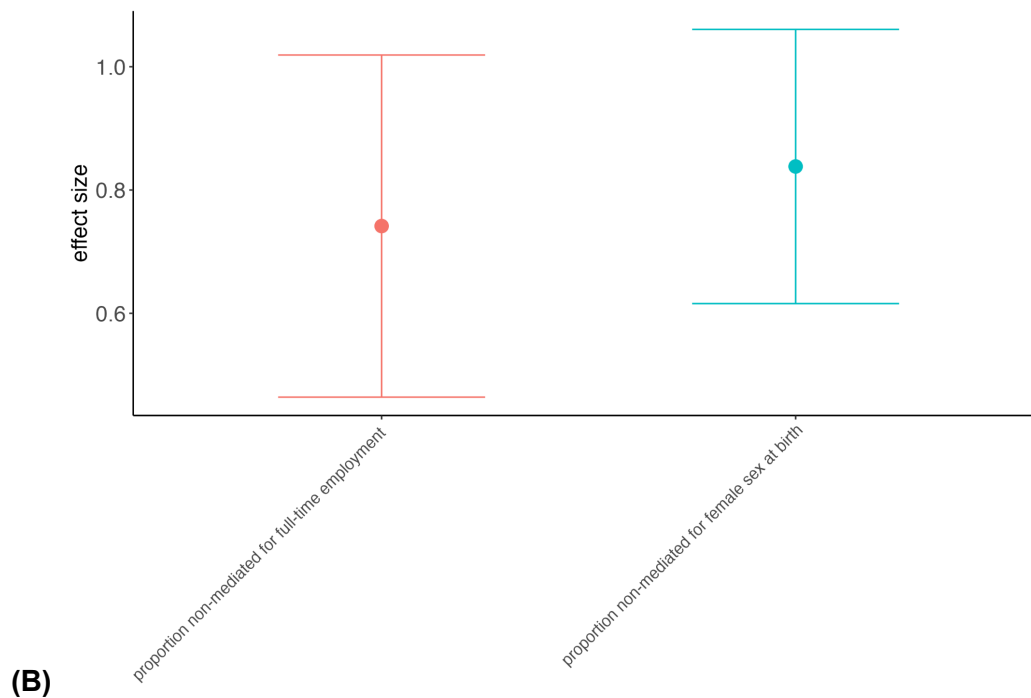

**Supplementary Figure S8. All output for the combined MIC cohort mediation analyses. Estimated NDEs and NIEs (point estimate and 95% confidence interval) (A). Colors denote the contrast of interest (pink: full-time employment vs all other employment status categories; cyan: female vs male sex). Estimate proportions non-mediated (B).**

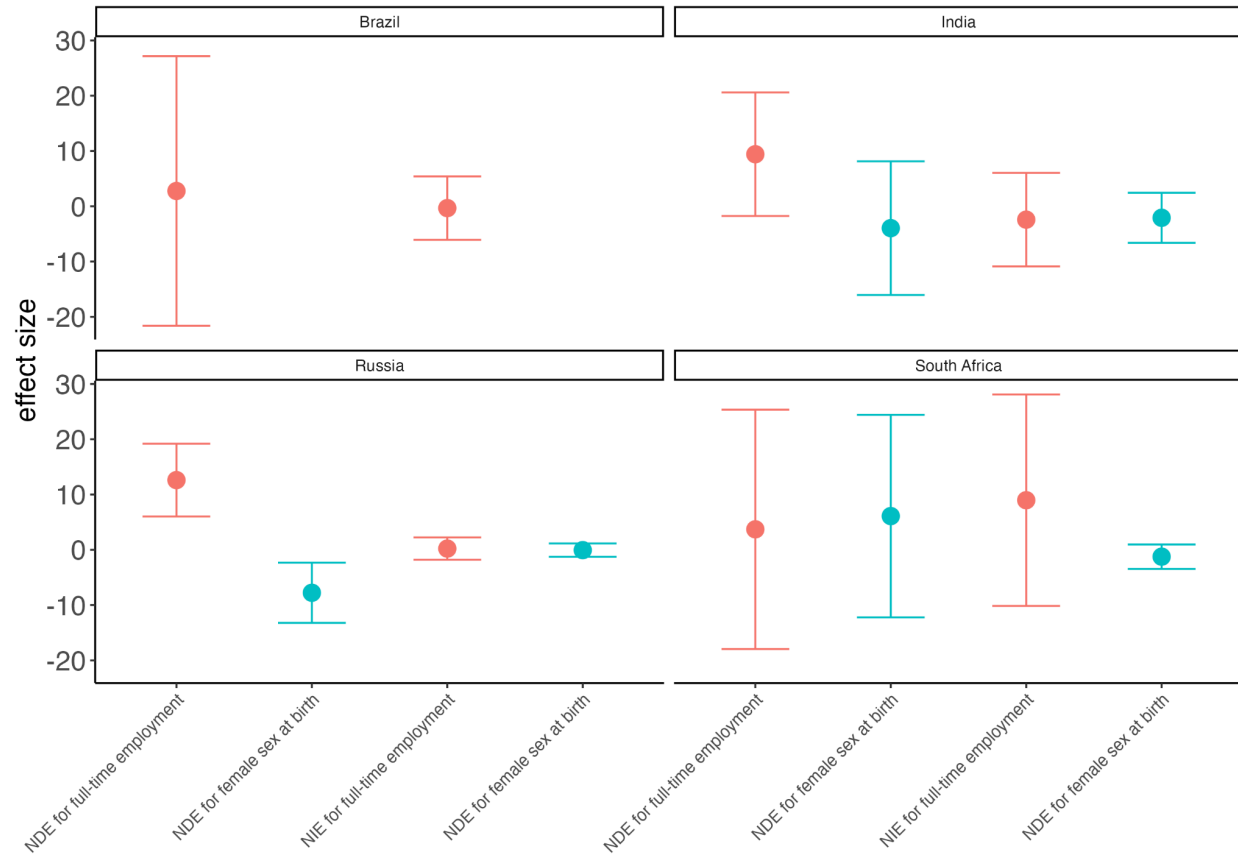

**Supplementary Figure S9. Output for country-specific mediation analyses in the combined MIC cohort. Panels are reported for each country, with estimated NDEs and NIEs (point estimate and 95% confidence interval) for each contrast. Colors denote the contrast of interest (pink: full-time employment vs all other employment status categories; cyan: female vs male sex; note no estimated NDE and NIE for sex in Brazil).**

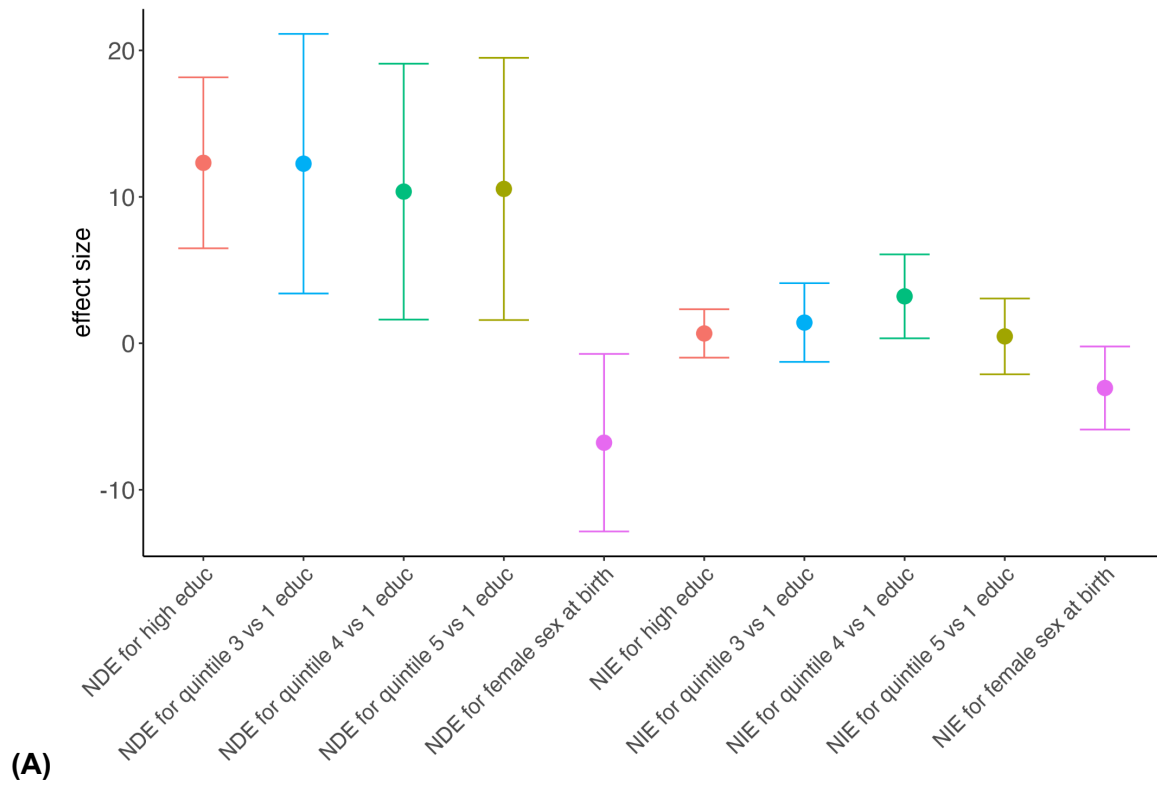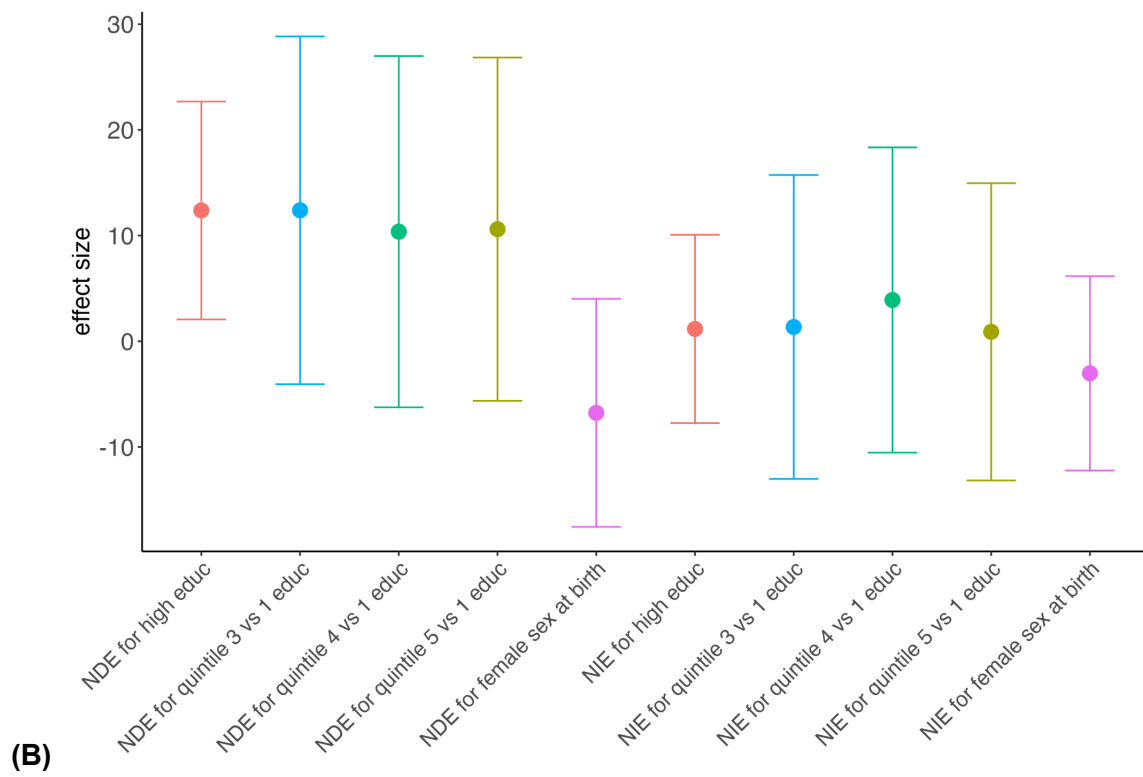

(c)

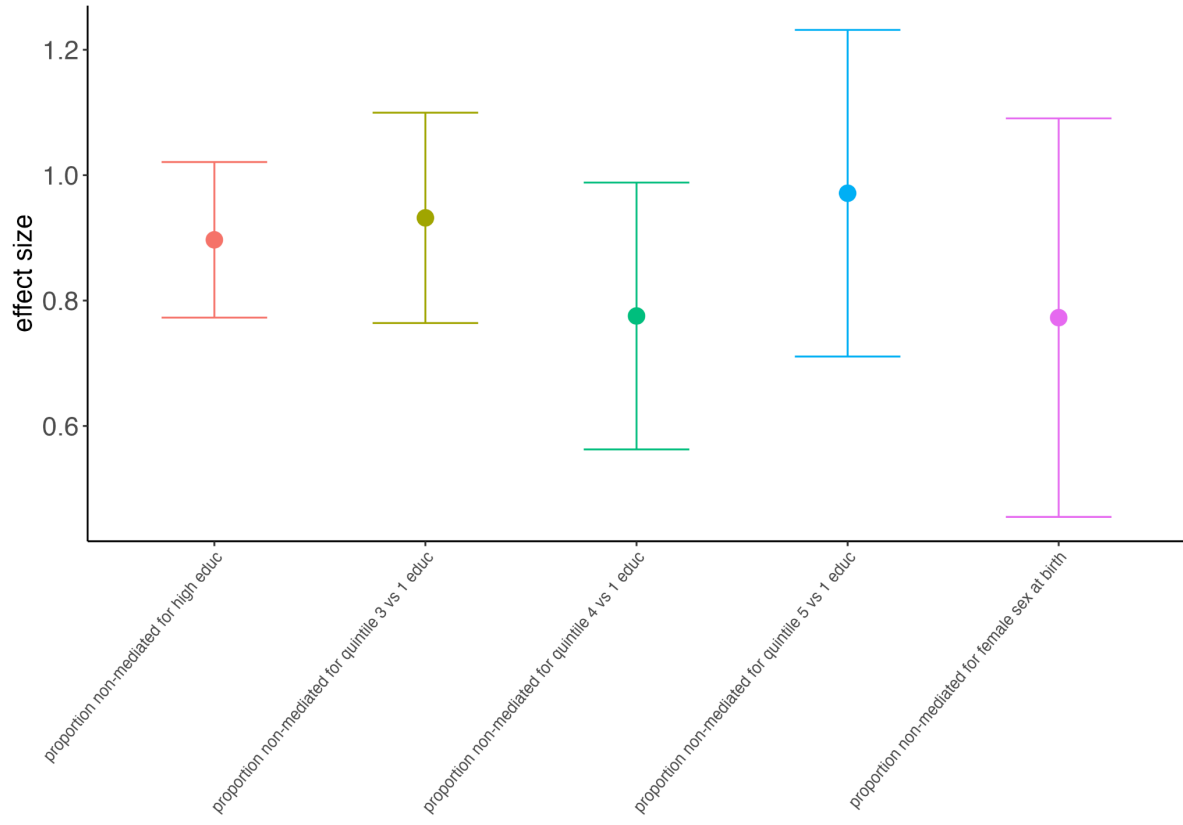

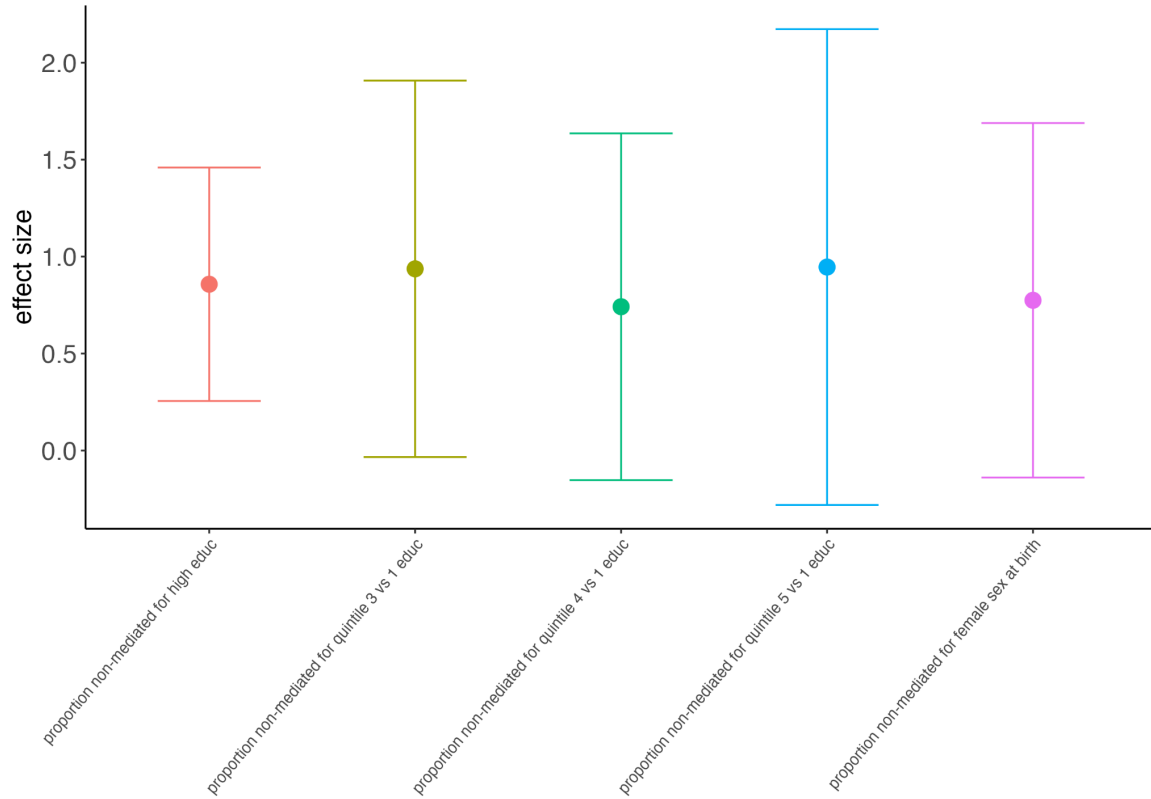

(D)

**Supplementary Figure S10. All output for Norway mediation analyses. Estimated NDEs and NIEs (point estimate and 95% confidence interval) in the main analysis (A) and in the sensitivity analysis (B). Colors denote the contrast of interest (pink: high vs low educational attainment; blue: quintile 3 vs 1 of educational attainment; green: quintile 4 vs 1 of educational attainment; khaki: quintile 5 vs 1 of educational attainment; purple: female vs male sex). Estimated proportions non-mediated (point estimate and 95% confidence interval) in the main analysis (C) and in the sensitivity analysis (D).**

(A)

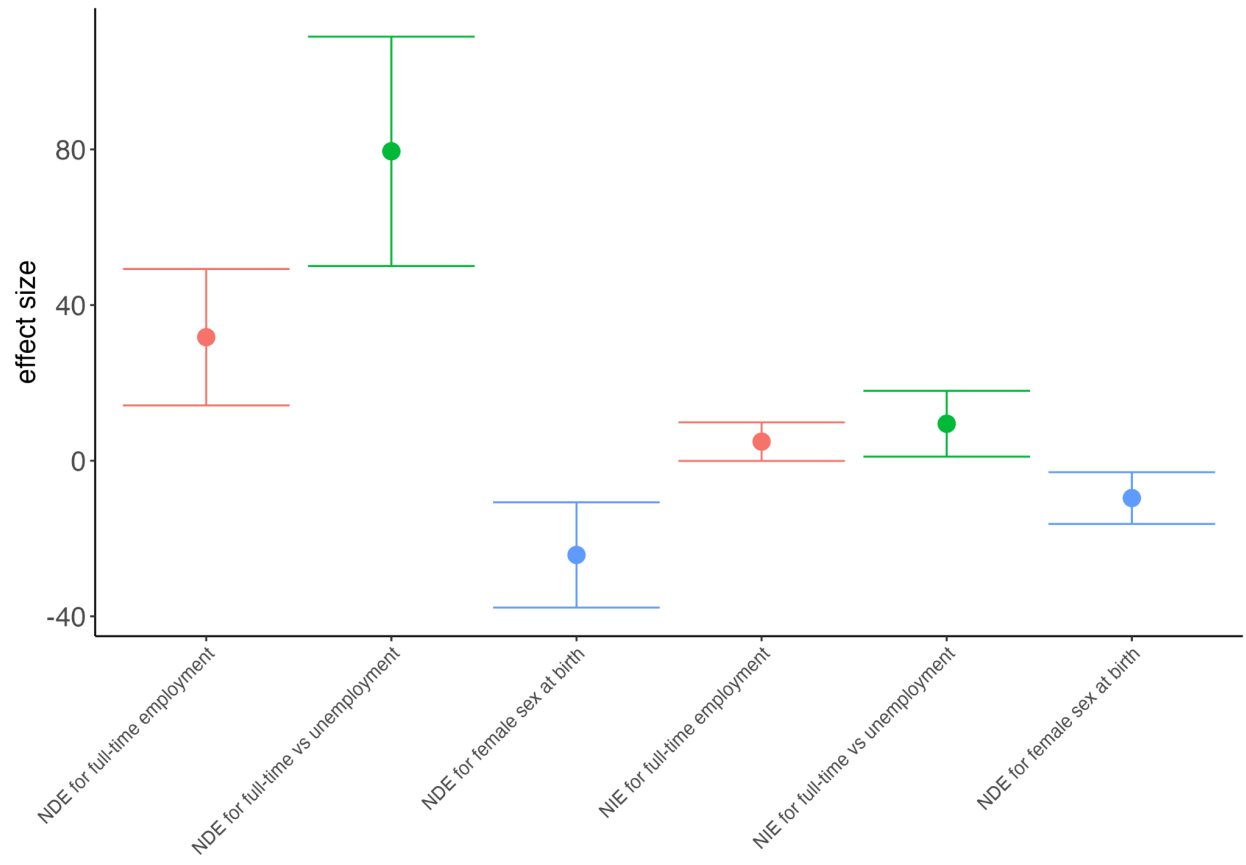



**(B)**

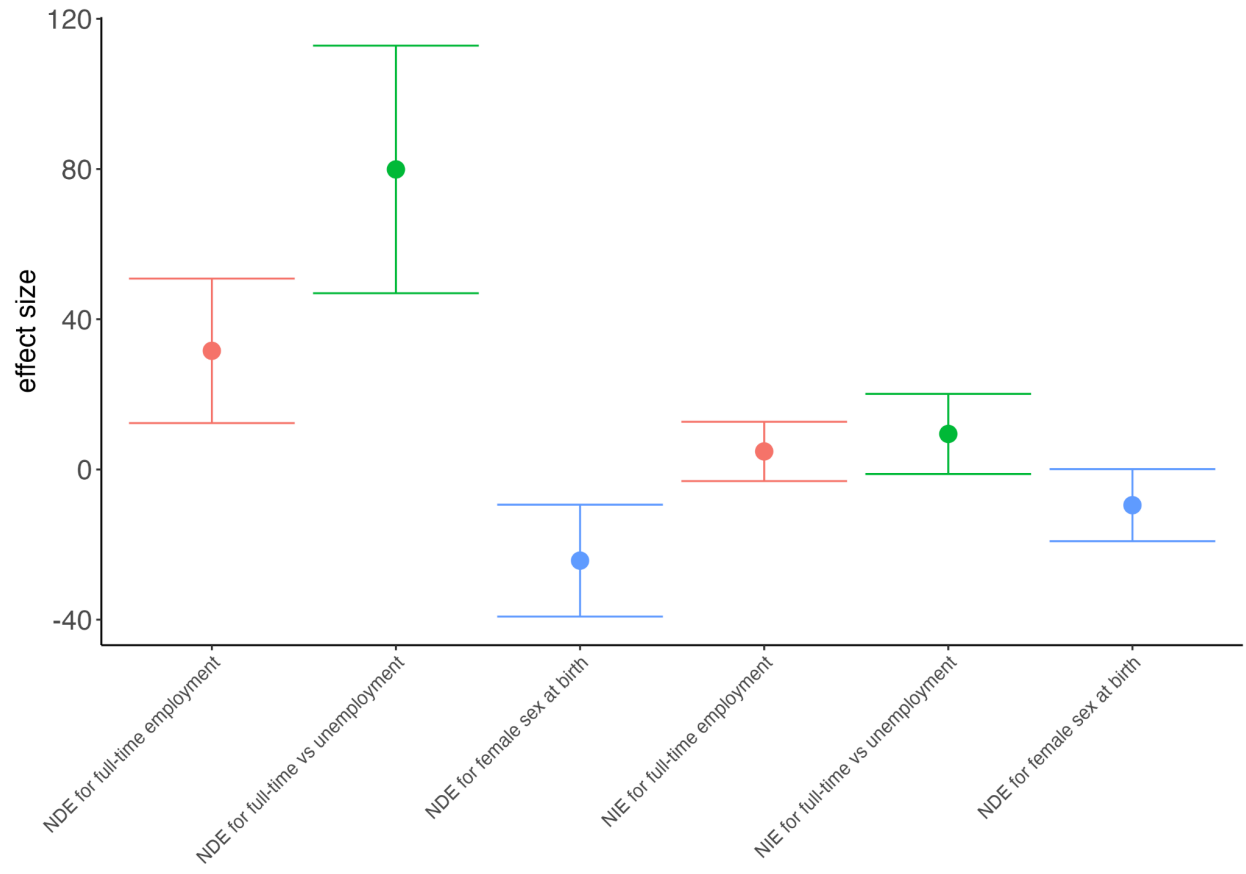

(c)

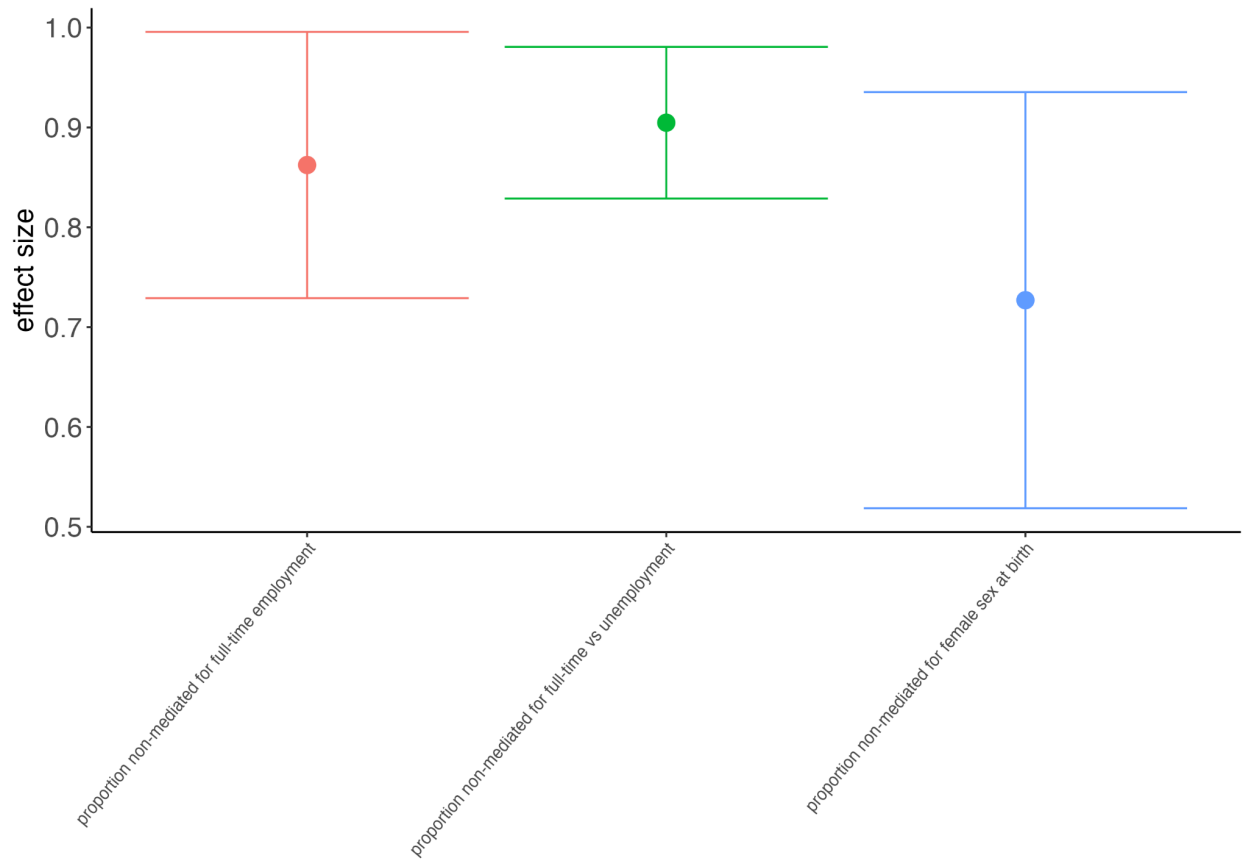

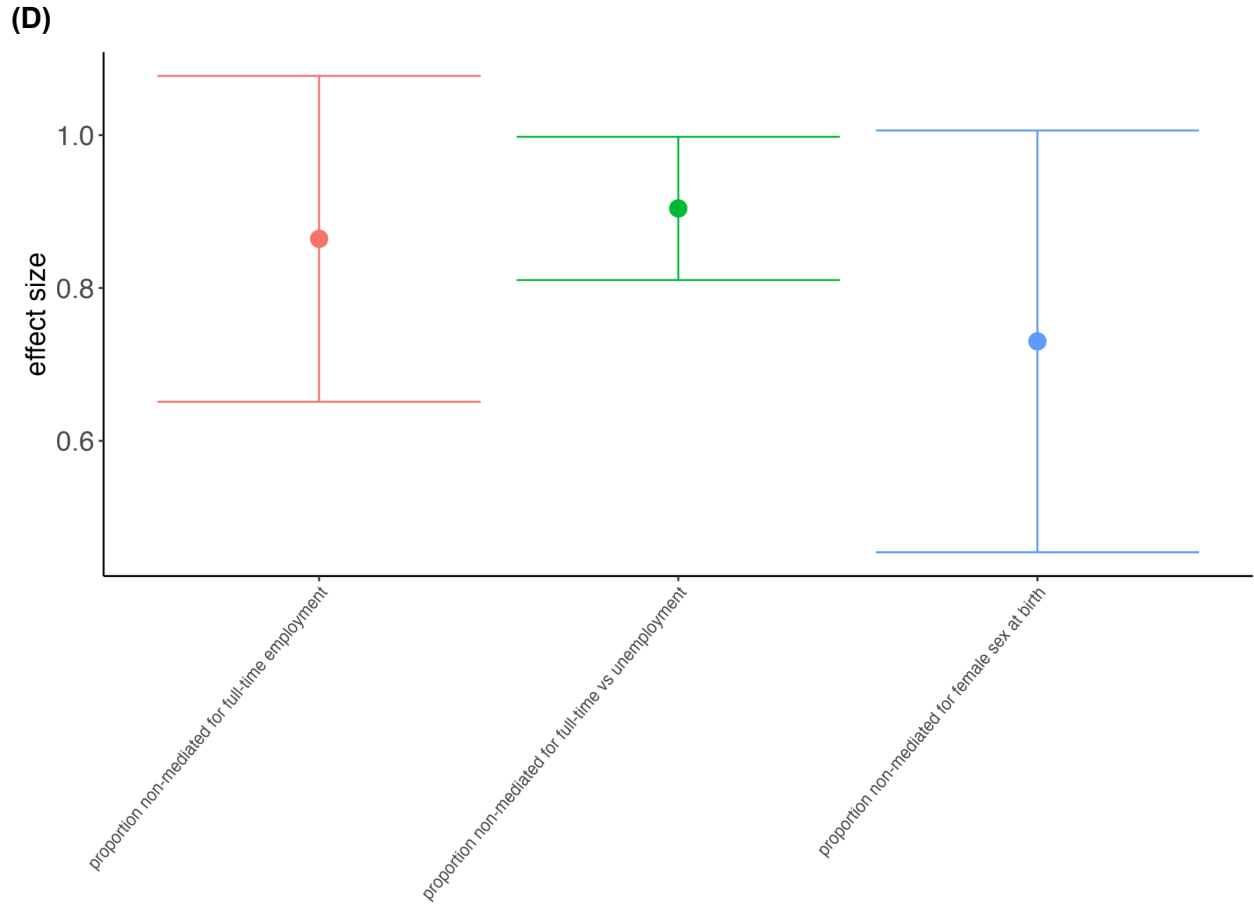

**Supplementary Figure S11. All output for UK mediation analyses. Estimated NDEs and NIEs (point estimate and 95% confidence interval) in the main analysis (A) and in the sensitivity analysis (B). Colors denote the contrast of interest (pink: full-time employment vs all other employment status categories; green: full-time employment vs unemployment; blue: female vs male sex). Estimated proportions non-mediated (point estimate and 95% confidence interval) in the main analysis (C) and in the sensitivity analysis (D).**

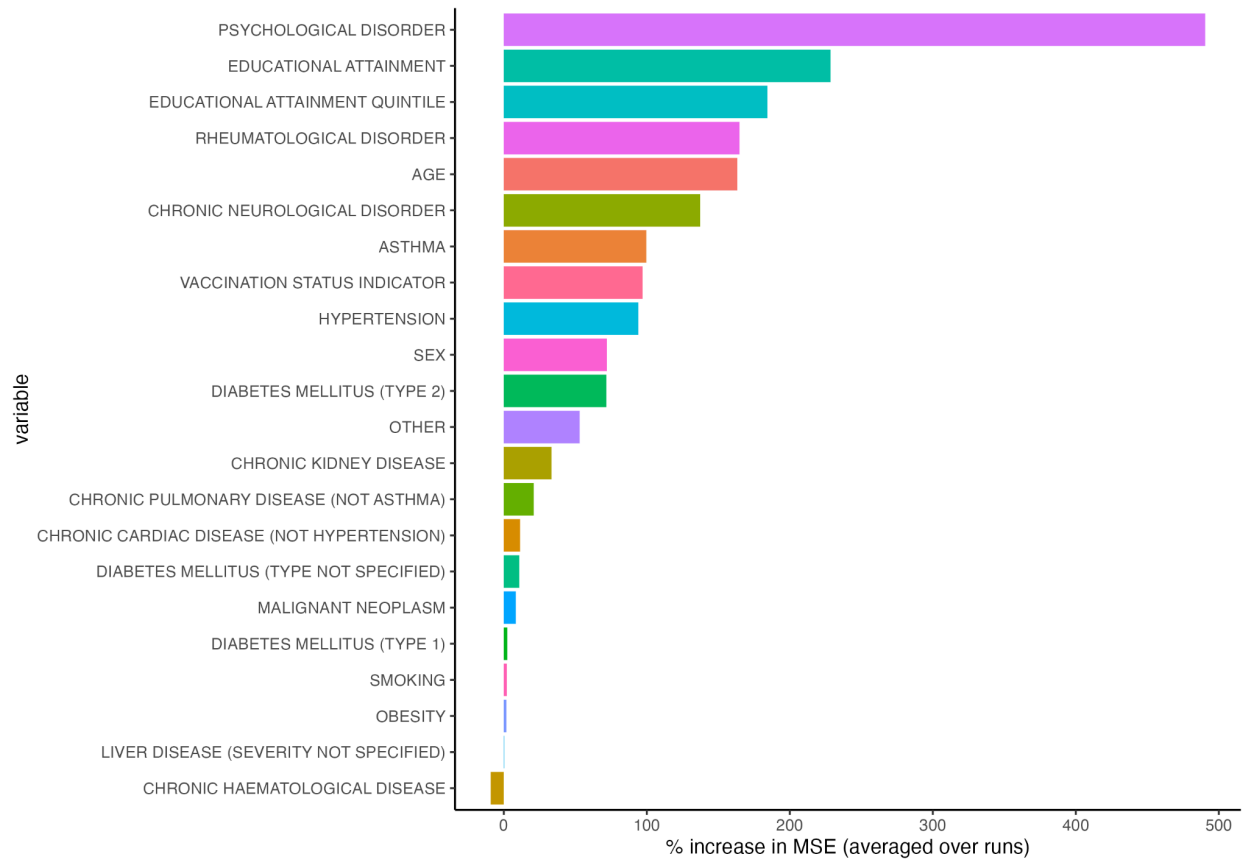

**Supplementary Figure S12a. Estimated variable importance measures, i.e. % increase in mean squared error or MSE, from individual random forest implementation (RF #1) for Norway (sex-based population correction sensitivity analysis).**

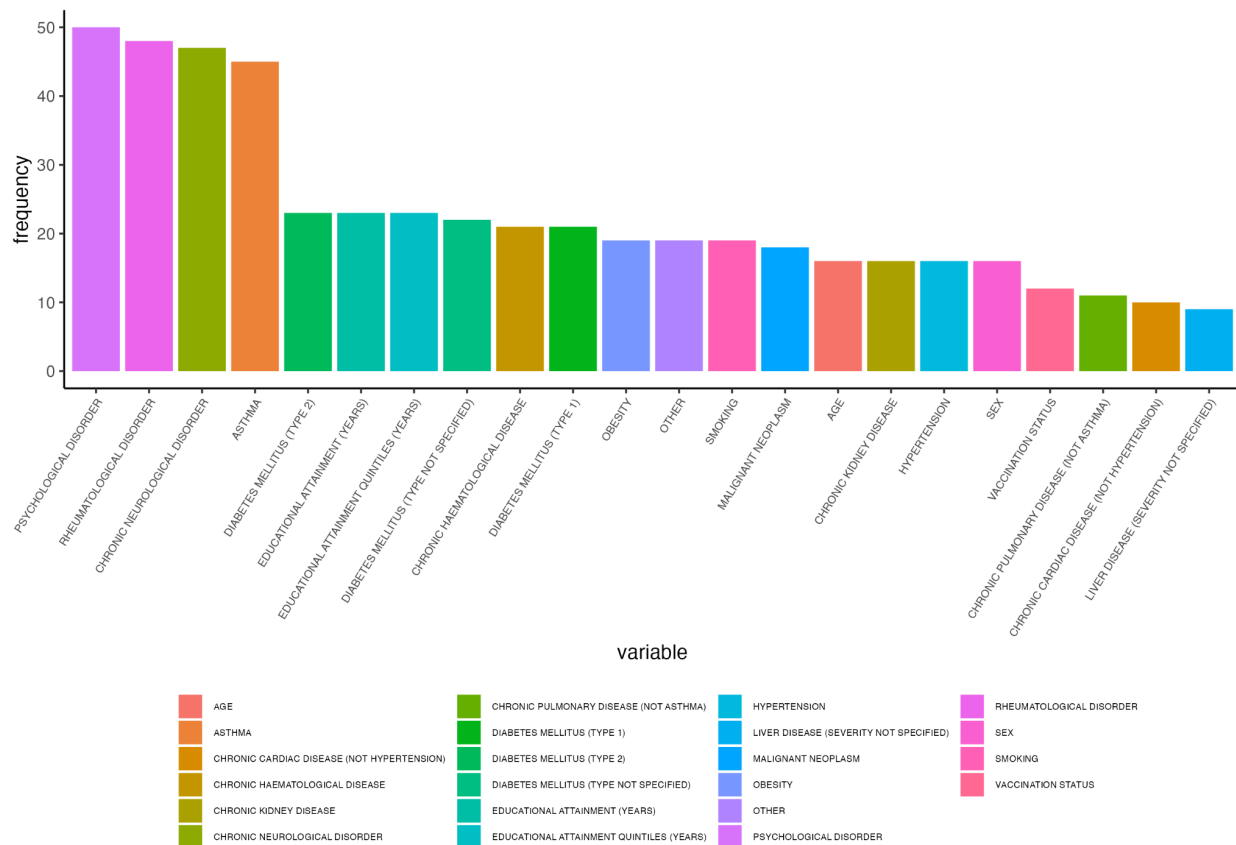

**Supplementary Figure S12b. Number of times (frequency) each variable appears in clusters selected for each CoV-VSURF run (RF #3) for Norway (sex-based population correction sensitivity analysis).**

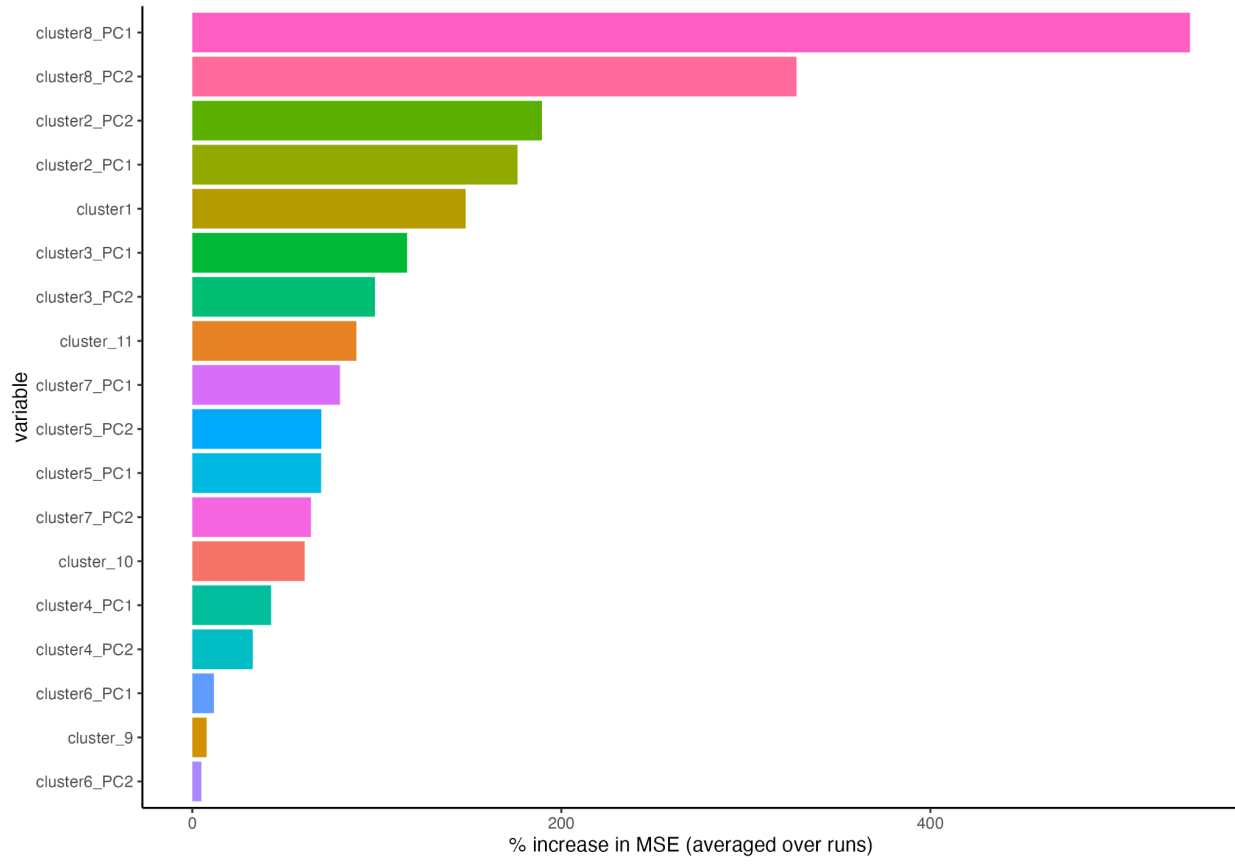

**Supplementary Figure S12c. Estimated variable importance measures, i.e. % increase in mean squared error or MSE, from pre-grouped random forest implementation (RF #2) for Norway. Rows indicate cluster names (a full list of variables belonging to each cluster can be found in Supplementary Table S3) and corresponding principal components, if the cluster consists of multiple variables. PC1 denotes principal component 1 and PC2 denotes principal component 2 (sex-based population correction sensitivity analysis).**

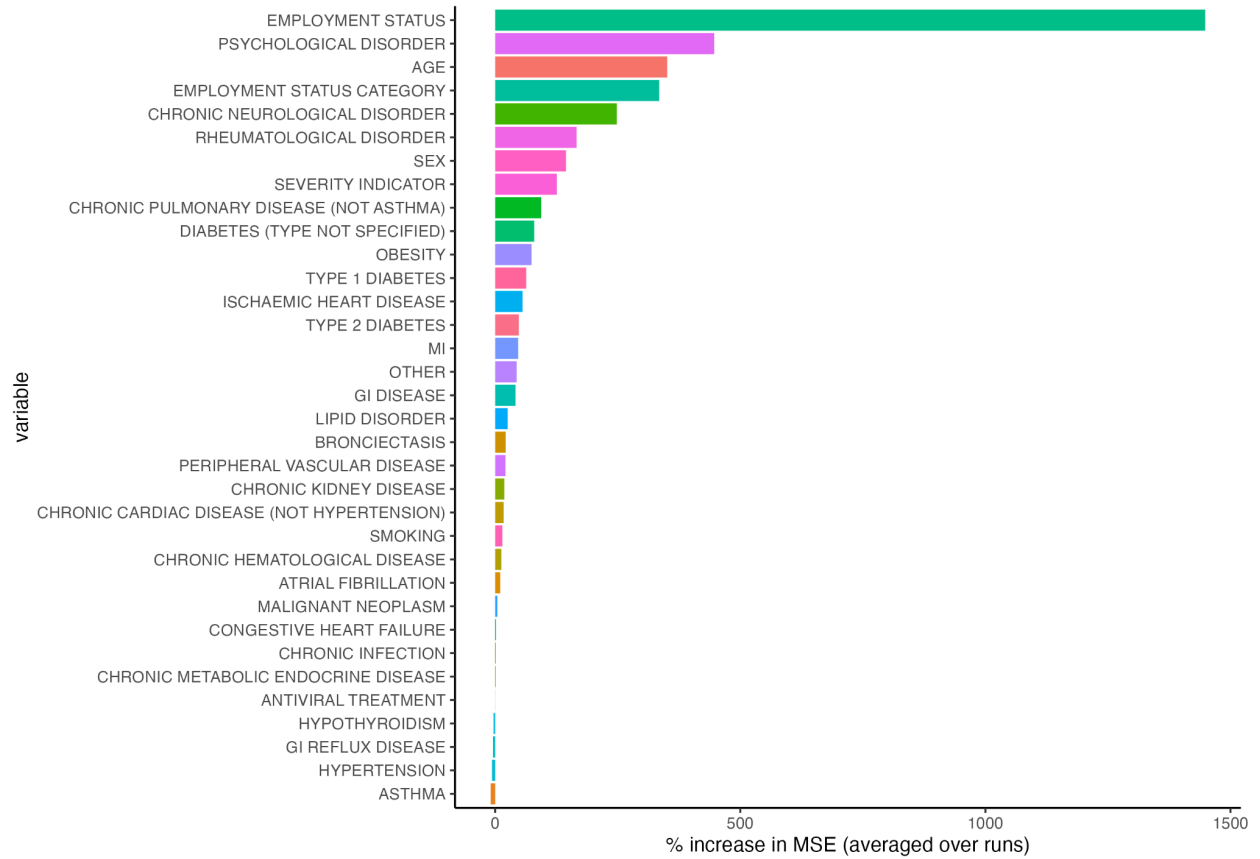

**Supplementary Figure S13a. Estimated variable importance measures, i.e. % increase in mean squared error or MSE, from individual random forest implementation (RF #1) for the UK (sex-based population correction sensitivity analysis).**

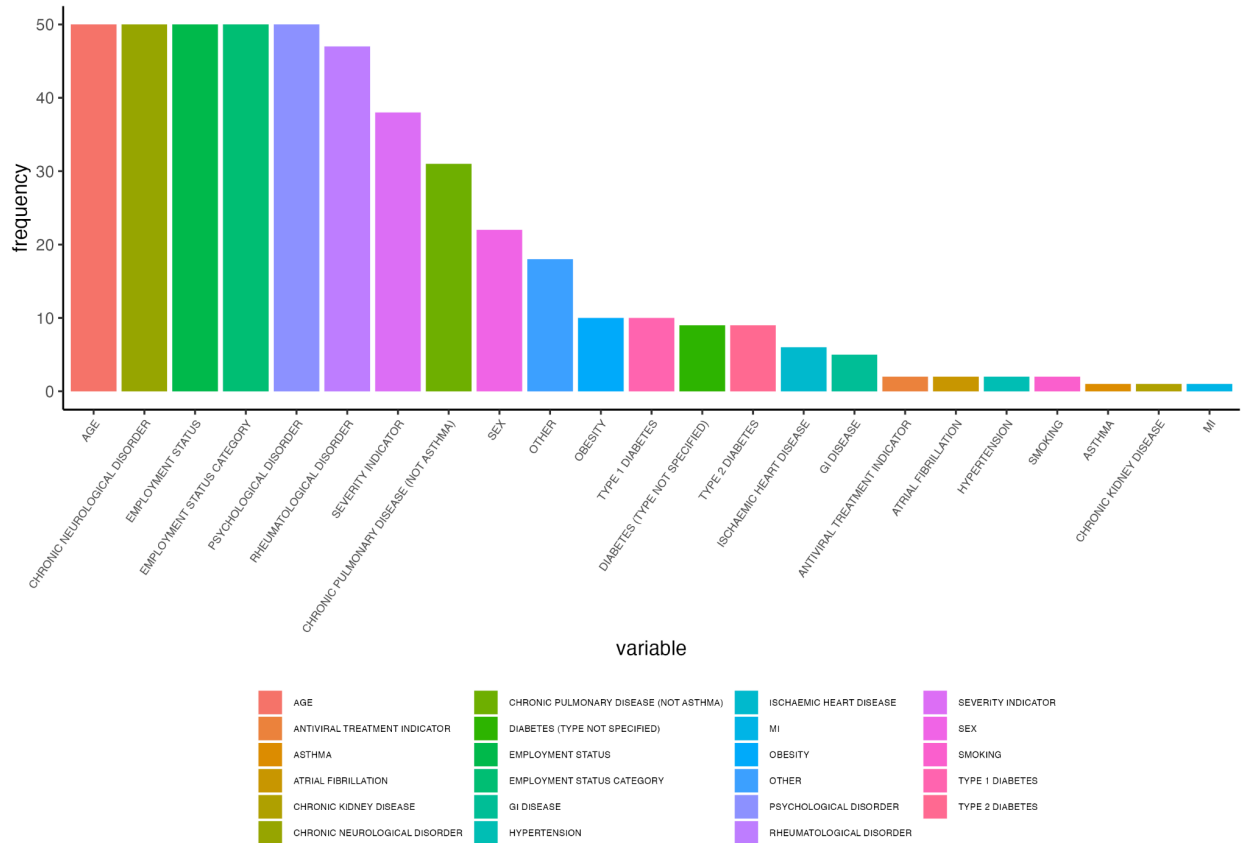

**Supplementary Figure S13b. Number of times (frequency) each variable appears in clusters selected for each CoV-VSURF run (RF #3) for the UK (sex-based population correction sensitivity analysis).**



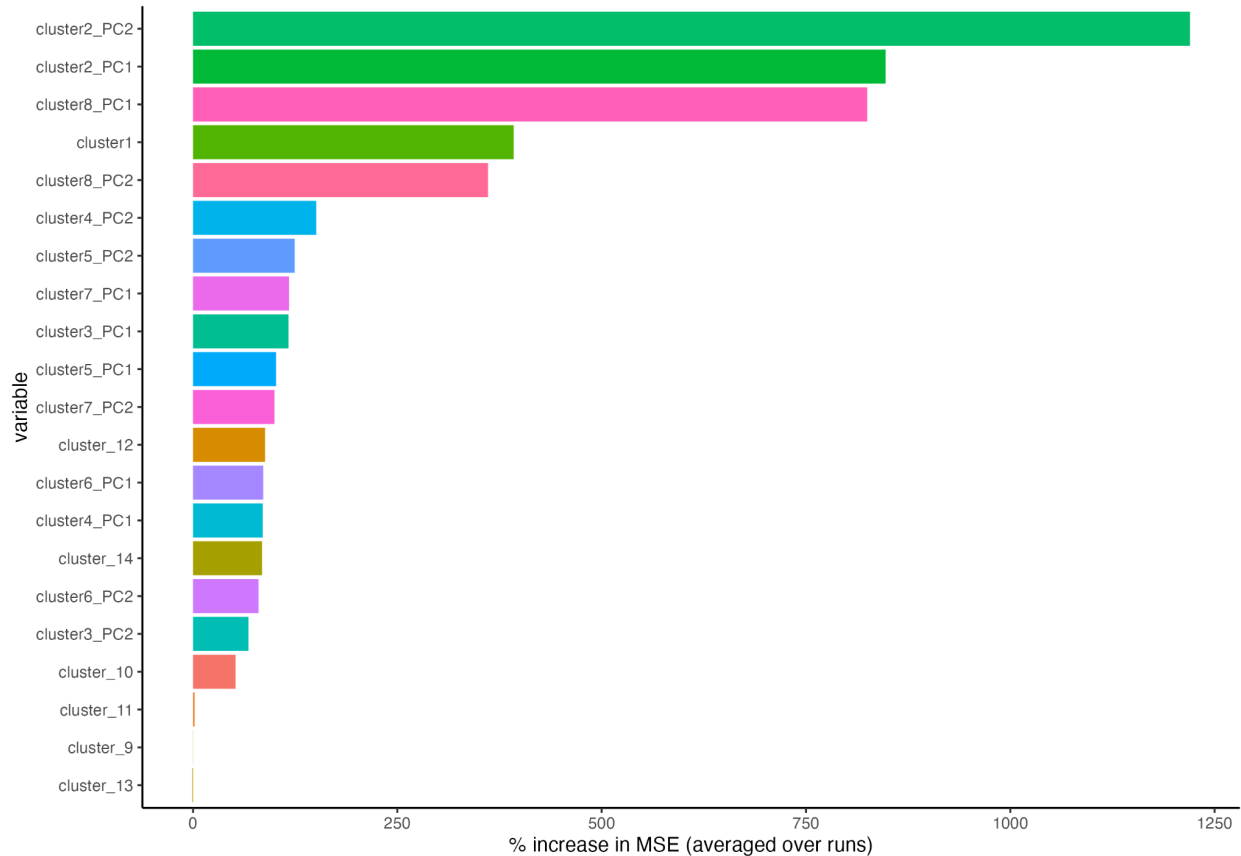

**Supplementary Figure S13c. Estimated variable importance measures, i.e. % increase in mean squared error or MSE, from pre-grouped random forest implementation (RF #2) for the UK. Rows indicate cluster names (a full list of variables belonging to each cluster can be found in Supplementary Table S3) and corresponding principal components, if the cluster consists of multiple variables. PC1 denotes principal component 1 and PC2 denotes principal component 2 (sex-based population correction sensitivity analysis).**

## References

1. Reyes, L. F. *et al.* Clinical characteristics, risk factors and outcomes in patients with severe COVID-19 registered in the International Severe Acute Respiratory and Emerging Infection Consortium WHO clinical characterisation protocol: a prospective, multinational, multicentre, observational study. *ERJ Open Res* **8**, 00552–02021 (2022).
2. Bramante, C. T. *et al.* Outpatient treatment of COVID-19 and incidence of post-COVID-19 condition over 10 months (COVID-OUT): a multicentre, randomised, quadruple-blind, parallel-group, phase 3 trial. *The Lancet Infectious Diseases* **23**, 1119–1129 (2023).
3. Stef van Buuren, Karin Groothuis-Oudshoorn (2011). mice: Multivariate Imputation by Chained Equations in R. *Journal of Statistical Software*, 45(3), 1-67. DOI 10.18637/jss.v045.i03.
4. Pasek J (2018). anesrake: ANES Raking Implementation. R package version 0.80,

- <https://CRAN.R-project.org/package=anesrake>.
5. Matthew DeBell & Jon A. Krosnick (2009). *Computing Weights for American National Election Study Survey Data*. ANES Technical Report series, no. nes012427. <https://electionstudies.org/wp-content/uploads/2018/04/nes012427.pdf>.
  6. ReStore National Centre for Research Methods. 5. Adjusting for non-response by weighting. <https://www.restore.ac.uk/PEAS/nonresponse.php>.
  7. Pew Research Center. 1. How different weighting methods work. <https://www.pewresearch.org/methods/2018/01/26/how-different-weighting-methods-work/#:~:text=With%20raking%2C%20a%20researcher%20chooses,the%20population%20or%20those%20variables> (2018).
  8. Kuhn, M. (2008). Building Predictive Models in R Using the caret Package. *Journal of Statistical Software*, 28(5), 1–26. <https://doi.org/10.18637/jss.v028.i05>
  9. A. Liaw and M. Wiener (2002). Classification and Regression by randomForest. *R News* 2(3), 18–22.
  10. Genuer R, Chavent M, Saracco J (2016). CoVVSURF: Combines clustering of variables with feature selection using random forests. R package version 0.1.
  11. François Husson. Principal Component Analysis (PCA). [https://husson.github.io/MOOC\\_GB/PCA\\_course\\_slides.pdf](https://husson.github.io/MOOC_GB/PCA_course_slides.pdf)
  12. Sebastien Le, Julie Josse, Francois Husson (2008). FactoMineR: An R Package for Multivariate Analysis. *Journal of Statistical Software*, 25(1), 1-18. 10.18637/jss.v025.i01
  13. van der Laan, M. J. & Rose, S. *Targeted Learning: Causal Inference for Observational and Experimental Data*. (Springer Science+Business Media, 2011).
  14. Hejazi, N. Causal Mediation Analysis. (2023). <https://tlverse.org/tlverse-workshops/causal-mediation-analysis.html>
  15. Hastie, T. & Tibshirani, R. Generalized Additive Models. *Statistical Science* 1, 297–318 (1986).
  16. Friedman, J. H. Greedy function approximation: A gradient boosting machine. *Ann. Statist.* 29, (2001).
  17. Shi Y, Ke G, Soukhavong D, Lamb J, Meng Q, Finley T, Wang T, Chen W, Ma W, Ye Q, Liu T, Titov N (2023). lightgbm: Light Gradient Boosting Machine. R. package version 3.3.5, <https://CRAN.R-project.org/package=lightgbm>.
  18. Salih, I. & Smith, S. H. Feedback neural network for pattern recognition. in (eds. Nasrabadi, N. M. & Katsaggelos, A. K.) 194–201 (San Jose, CA, 1999). doi:[10.1117/12.341120](https://doi.org/10.1117/12.341120).
  19. Venables, W. N. & Ripley, B. D. (2002) *Modern Applied Statistics with S*. Fourth Edition. Springer, New York. ISBN 0-387-95457-0
  20. van der Laan, M. J., Polley, E. C. & Hubbard, A. E. Super Learner. *sagmb* 6, (2007).
  21. Coyle J, Hejazi N, Malenica I, Phillips R, Sofrygin O (2024). sl3: Pipelines for Machine Learning and Super Learning. doi:[10.5281/zenodo.1342293](https://doi.org/10.5281/zenodo.1342293). <https://doi.org/10.5281/zenodo.1342293>, R package version 1.4.4, <https://github.com/tlverse/sl3>.
  22. Mullen KM, van Stokkum IHM (2012). nnls: The Lawson-Hanson algorithm for non-negative least squares (NNLS). R package version 1.4, <https://CRAN.R-project.org/package=nnls>.
  23. Hejazi, N., Rudolph, K. & Díaz, I. medoutcon: Nonparametric efficient causal mediation analysis with machine learning in R. *JOSS* 7, 3979 (2022).
  24. Johannes Textor, Benito van der Zander, Mark K. Gilthorpe, Maciej Liskiewicz, George T.H. Ellison (2016). Robust causal inference using directed acyclic graphs: the R package 'dagitty'. *International Journal of Epidemiology* 45(6):1887-1894.
  25. Barrett M (2023). ggdag: Analyze and Create Elegant Directed Acyclic Graphs. R package version 0.2.10, <https://CRAN.R-project.org/package=ggdag>.

26. R Core Team (2021). R: A language and environment for statistical computing. R Foundation for Statistical Computing, Vienna, Austria. <https://www.R-project.org/>.
27. Sun, S., Chuang, L.-H., Sahlén, K.-G., Lindholm, L. & Norström, F. Estimating a social value set for EQ-5D-5L in Sweden. *Health Qual Life Outcomes* **20**, 167 (2022).
28. Devlin, N. J., Shah, K. K., Feng, Y., Mulhern, B. & Van Hout, B. Valuing health-related quality of life: An EQ-5D-5L value set for England. *Health Economics* **27**, 7–22 (2018).
29. Jyani, G. *et al.* Development of an EQ-5D Value Set for India Using an Extended Design (DEVINE) Study: The Indian 5-Level Version EQ-5D Value Set. *Value in Health* **25**, 1218–1226 (2022).
